1 **The branched chain aminotransferase IlvE promotes growth, stress resistance and**  
2 **pathogenesis of *Listeria monocytogenes***

3 Karla D. Passalacqua<sup>a\*##</sup>, Tianhui Zhou<sup>a\*</sup>, Tracy A. Washington<sup>b</sup>, Basel H. Abuaita<sup>a</sup>, Abraham  
4 L. Sonenshein<sup>b</sup>, Mary X.D. O’Riordan<sup>a#</sup>

5  
6 <sup>a</sup>University of Michigan Medical School, Department of Microbiology & Immunology, Ann  
7 Arbor, MI

8 <sup>b</sup>Tufts University School of Medicine, Department of Molecular Biology & Microbiology,  
9 Boston, MA

10  
11 Running title: Branched chain fatty acids in *Listeria*

12  
13 <sup>#</sup>Address correspondence to: [kpassal@umich.edu](mailto:kpassal@umich.edu); [oriordan@umich.edu](mailto:oriordan@umich.edu)

14  
15 \*Karla D. Passalacqua and Tianhui Zhou contributed equally to this work. Author order was  
16 determined on the basis of seniority.

17

18 **ABSTRACT**

19           The bacterial plasma membrane is a key interface during pathogen-host interactions, and  
20 membrane composition enhances resistance against host antimicrobial defenses. Branched chain  
21 fatty acids (BCFAs) are the major plasma membrane component in the intracellular Gram-  
22 positive pathogen *Listeria monocytogenes* (Lm) and BCFA metabolism is essential for Lm  
23 growth and virulence. BCFA synthesis requires branched chain amino acids (BCAAs), and the  
24 BCAA Isoleucine (Ile) is a necessary substrate for the predominant membrane anteiso-BCFAs  
25 (ai-BCFAs) as well as an environmental signal for virulence regulation in Lm. In this study, we  
26 explored how two proteins that metabolize or sense Ile contribute to Lm growth, BCFA  
27 metabolism, and virulence. The IlvE aminotransferase incorporates Ile into ai-BCFAs, while  
28 CodY is an Ile-sensing regulator that coordinates BCAA synthesis and virulence gene  
29 expression. Analysis of deletion mutants lacking IlvE ( $\Delta ilvE$ ) or CodY ( $\Delta codY$ ) revealed a major  
30 role for IlvE under nutrient restriction and stress conditions. Cultures of the  $\Delta ilvE$  mutant  
31 contained proportionally less ai-BCFAs relative to wild type, while of the  $\Delta codY$  mutant had a  
32 lower proportion of ai-BCFAs in stationary phase, despite containing more cell-associated Ile.  
33 Both  $\Delta ilvE$  and  $\Delta codY$  mutants required exogenous Ile for optimal growth, but the  $\Delta ilvE$  mutant  
34 had an absolute requirement for Valine and Leucine when Ile was absent. IlvE was also  
35 necessary for resistance to membrane stress, cell-to-cell spread, infection of primary  
36 macrophages, and virulence in mice. Our findings implicate IlvE as an integral aspect of Lm  
37 stress resistance and emphasize the central importance of Ile in Lm growth and virulence.

38

## 39 INTRODUCTION

40 The bacterial plasma membrane is a key interface of pathogen-host interactions and an  
41 important intrinsic barrier to host antimicrobial defenses. Situated just beneath and intimately  
42 connected to the bacterial cell wall, the plasma membrane is a crucial structure of the bacterial  
43 cell surface; thus, the interface between bacterium and host cell is of particular importance for  
44 intracellular pathogens such as *Listeria monocytogenes* (Lm), the causative agent of listeriosis  
45 (1-3). During its infectious cycle, Lm enters mammalian cells and traverses through a range of  
46 cellular locales, each with distinct nutrient availability, redox state, and host antibacterial  
47 mechanisms (4). Here, the bacterial membrane serves as an environmental sensor and a  
48 defensive structure central to intracellular survival and replication (5). Therefore, exploring Lm  
49 membrane dynamics is central for elucidating virulence strategies of this important pathogen.

50 As in many Gram-positive bacteria, including *Staphylococcus aureus*, the Lm plasma  
51 membrane is predominantly composed of branched chain fatty acids (BCFAs), a structural  
52 feature important for bacterial integrity against multiple stresses and during pathogenesis (6-14).  
53 Odd numbered (C15, C17) anteiso-BCFAs (ai-BCFAs) are the most abundant form of BCFA in  
54 the Lm membrane, and the ability of Lm to thrive in cold temperatures is due in large part to  
55 high ai-BCFA content that enhances membrane fluidity (15-17). To optimize membrane fluidity  
56 in different environments, Gram-positive bacteria alter the ratio of ai-BCFAs to iso-BCFAs,  
57 where ai-BCFAs contribute to higher fluidity due to positioning of the terminal methyl groups on  
58 the acyl chains (18). Because BCFA synthesis depends on the acquisition and/or biosynthesis of  
59 branched chain amino acids (BCAAs: Isoleucine, Leucine and Valine [Ile, Leu, Val]) (7, 19),  
60 membrane remodeling and BCAA metabolism are tightly linked. While Lm is fully capable of  
61 synthesizing BCAAs *de novo*, exogenous BCAAs are required for optimal growth due in part to

62 high demand for BCFAs in the membrane and the activity of a ribosome-mediated attenuator that  
63 limits BCAA synthesis (20, 21). During infection, Lm replicates inside host cells where BCAAs  
64 and other nutrients are limited and may be actively withheld from bacteria by host defense  
65 mechanisms (22, 23). Therefore, the ability of Lm to acquire host BCAAs and to make *de novo*  
66 BCAAs, especially Ile, to generate membranes with high BCFA levels is critical to Lm  
67 pathogenesis.

68 Branched chain amino acid aminotransferase (BCAT) enzymes initiate bacterial BCFA  
69 synthesis by converting BCAAs into branched chain  $\alpha$ -keto acids. Downstream of BCAT,  
70 branched chain  $\alpha$ -keto dehydrogenase enzymes (BKD) produce acyl coenzyme A (CoA)  
71 molecules that are the primers for fatty acid synthesis (Fig. 1A) (9). While BKD is essential for  
72 BCFA metabolism and protection from host immune defenses such as antimicrobial peptides  
73 (12, 13), the Lm BCAT IlvE is required for resistance to the compound *trans*-cinnamaldehyde, a  
74 small molecule with anti-microbial properties (14, 24). Additionally, the transcriptional regulator  
75 CodY, which senses BCAA and GTP levels, plays a major role in coordinating BCAA  
76 metabolism with virulence gene expression (21, 25-28). Importantly, when Ile levels are high,  
77 CodY inhibits *de novo* BCAA synthesis, and when Ile levels are low, this inhibition is relieved,  
78 allowing the bacteria to synthesize vital BCAAs (7). Thus, the ability of Lm to sense and  
79 regulate BCAA levels, particularly Ile, and to implement BCFA remodeling is an important  
80 attribute for adaptation to changing environments, especially in stress conditions as found in the  
81 mammalian host.

82 Due to the central requirement for Ile in promoting membrane integrity through  
83 generation of ai-BCFAs and for engaging CodY regulatory activity, we hypothesized that  
84 proteins involved in Ile metabolism are central to the ability of Lm to cause disease. Therefore,

85 we used a genetic approach to explore how the BCAT IlvE and the regulator CodY contribute to  
86 membrane dynamics, growth and pathogenesis of Lm. Here we show that deficiency of either  
87 IlvE or CodY can alter membrane fatty acid content, but bacteria lacking IlvE are very  
88 susceptible to membrane stress and nutrient limitation and are less fit in *in vitro* and *in vivo*  
89 infection models.

90

## 91 **RESULTS**

92

### 93 **Membrane anteiso-BCFA generation requires IlvE and relies on CodY for homeostasis in** 94 **stationary phase in nutrient restricted medium**

95 Isoleucine (Ile) is an essential metabolite for protein translation and for synthesis of the  
96 high ai-BCFA membrane content of Lm (Fig. 1A), and the aminotransferase IlvE is predicted to  
97 be the first enzyme that commits Ile into the biosynthetic pathway for odd-numbered (C15, C17)  
98 ai-BCFAs. Low availability of Ile in the intracellular environment during infection is thought to  
99 act as a signal for Lm to coordinate metabolism and virulence, mainly through the Ile-sensing  
100 transcriptional regulator CodY (21, 26, 27). To characterize dynamics of Ile usage in BCFA  
101 biosynthesis and virulence, we assessed deletion mutant strains lacking IlvE or CodY ( $\Delta ilvE$  and  
102  $\Delta codY$  mutants) (Table S1 and Methods).

103 Previously, an *ilvE* transposon-generated null mutant was shown to have extremely low  
104 levels of ai-BCFAs when grown in rich, undefined BHI medium (14). Therefore, we predicted  
105 that the  $\Delta ilvE$  strain created for this study would have substantially lower levels of ai-BCFA  
106 when grown in a nutrient-limited medium (Fig. 1A). Additionally, we predicted that the  $\Delta codY$   
107 mutant would generate ai-BCFA levels equivalent to WT, since eliminating CodY inhibition of

108 *de novo* BCAA synthesis should increase bacterial BCAA levels, resulting in ample building  
109 blocks for ai-BCFAs. Note that recent RNAseq analysis showed that the expression of the Ile,  
110 Leu, Val-production operon increased substantially in the  $\Delta codY$  mutant in both rich medium  
111 (BHI) and in nutrient-limited medium (29), but not when BCAAs were extremely limited;  
112 moreover, the *codY* null mutation had no significant impact on *ilvE* transcription in any media  
113 tested (T. A. Washington, A. L. Sonenshein and B. R. Belitsky, manuscript in preparation)  
114 despite the fact that CodY has a relatively strong binding site upstream of *ilvE* (30), which could  
115 also be a regulatory binding site for the locus upstream of *ilvE*. Therefore, to test the role of IlvE  
116 and CodY in fatty acid metabolism, we measured total fatty acid content in WT,  $\Delta ilvE$ ,  
117  $\Delta ilvE::ilvE^+$  (*ilvE* complemented) and  $\Delta codY$  strains grown to mid-logarithmic and stationary  
118 phase in *Listeria* defined medium (LDM - contains seven amino acids including BCAAs) (29), a  
119 nutrient-limited medium (Fig. 1B-C, Tables 1-2, Tables S3-S4).

120 The  $\Delta ilvE$  strain contained significantly lower proportions of ai-BCFAs in the total fatty  
121 pool compared to WT (Fig. 1B-C). During both culture phases, WT cells had greater than 80%  
122 ai-BCFAs, while  $\Delta ilvE$  cells had 30% ai-BCFAs in logarithmic phase and 21% ai-BCFAs in  
123 stationary phase. Whereas WT cells had extremely low levels of iso-BCFAs (0.9 – 12%), the  
124  $\Delta ilvE$  strain included substantial levels odd-numbered iso-C15 and iso-C17 fatty acids (37%) and  
125 even-numbered iso-C14 and iso-C16 (26% to 33%) (Tables 1 and 2). This indicates that in the  
126 absence of IlvE, Lm must incorporate the other BCAAs (Leu and Val) into BCFAs. The  
127 complemented strain  $\Delta ilvE::ilvE^+$  showed an almost identical fatty acid profile to WT in both  
128 phases. Interestingly, the  $\Delta codY$  mutant differed markedly from WT in stationary phase. Here,  
129 ai-BCFAs made up 63% of the fatty acid profile, and even-numbered iso-BCFAs increased to  
130 22% (ten-fold higher than WT). These results suggest that CodY may contribute to membrane

131 BCFA remodeling when salvageable nutrients are depleted, and may repress genes involved in  
132 iso-BCFA synthesis during stationary phase.

133 We conclude that IlvE is a major driver for ai-BCFA generation during Lm growth in  
134 nutrient-limited medium; however, bacteria lacking IlvE were still able to generate more than  
135 20% ai-BCFAs, suggesting the presence of another aminotransferase that is able to incorporate  
136 Ile into ai-BCFA. Additionally, we conclude that CodY is involved in BCFA homeostasis during  
137 stationary phase in LDM.

138

### 139 **Bacteria lacking CodY harbor higher levels of BCAA compared to WT**

140 CodY is a sensor of BCAAs in Gram-positive bacteria, particularly Ile, and controls  
141 BCAA synthesis when these important metabolites are at low levels (31, 32). We initially  
142 hypothesized that bacteria lacking CodY would constitutively synthesize BCAAs in addition to  
143 acquiring exogenous BCAAs, and therefore should be well positioned to generate sufficient  
144 levels of ai-BCFAs regardless of growth phase. However, the observation that the  $\Delta codY$  mutant  
145 had lower levels of ai-BCFAs in stationary phase in LDM (Fig. 1C) prompted us to directly  
146 measure levels of cell-associated BCAAs during growth in LDM. We therefore grew WT,  
147  $\Delta codY$ ,  $\Delta ilvE$  and  $\Delta ilvE::ilvE^+$  strains in LDM to mid-logarithmic and stationary phase, removed  
148 the extracellular medium, and assessed cell-associated BCAA content by mass spectrometry  
149 (Fig. 1D-E). Unsurprisingly,  $\Delta codY$  lysates contained higher levels of all three BCAAs relative  
150 to WT during logarithmic growth, with Ile being the highest (~2.5-fold higher relative to WT),  
151 confirming the role of CodY for BCAA synthesis during nutrient-restriction. Notably, we  
152 observed approximately three-fold more Ile in stationary phase cultures for the  $\Delta codY$  mutant  
153 relative to WT, but similar levels of Leu and Val. Thus, although the  $\Delta codY$  strain in stationary

154 phase contains more Ile available for ai-BCFA compared to WT, this strain does not match WT  
155 levels of Ile incorporation into ai-BCFAs. These data suggest that CodY may play a role in  
156 membrane ai-BCFA homeostasis during stationary phase through an as yet undefined  
157 mechanism.

158         Since bacteria lacking IlvE showed a severe reduction in ai-BCFA content in LDM, we  
159 hypothesized that the  $\Delta ilvE$  mutant would harbor higher levels of cell-associated Ile during all  
160 growth phases in LDM compared to WT due to the lack of incorporation of this amino acid into  
161 ai-BCFAs. However, we observed similar levels of Ile in the  $\Delta ilvE$  mutant and in WT during  
162 logarithmic growth, and wide variability of cell-associated Ile in the  $\Delta ilvE$  strain during  
163 stationary phase (Fig. 1D-E). Also, Val was approximately half the level in the  $\Delta ilvE$  mutant  
164 compared to WT in logarithmic and stationary phase (Fig. 1D-E), while the Leu level was less  
165 than half of WT only in stationary phase. These data suggest that when IlvE is lacking, Lm uses  
166 Val and Leu for BCFA metabolism.

167

### 168 **Growth in BCAA-limiting conditions requires branched-chain aminotransferase IlvE**

169         While fatty acid analysis represents relative levels of lipid species in a population of  
170 cells, these data do not reveal differences in growth rate between strains. Therefore, we  
171 examined the contributions of IlvE and CodY to bacterial growth in nutrient replete Brain-Heart  
172 Infusion medium (BHI) and in nutrient-limited LDM. All growth experiments were initiated  
173 using bacteria grown to mid-logarithmic phase in LDM. We hypothesized that because the  
174 absence of CodY normally contributes to increased BCAA biosynthesis during Ile limitation  
175 (26),  $\Delta codY$  bacteria would grow as well as, or better than, WT bacteria in LDM. We also



176 hypothesized that growth of the  $\Delta ilvE$  mutant would be slower than WT in nutrient-limited  
177 medium due to its severe reduction in ai-BCFAs, a major membrane component for Lm.

178 In BHI, both the  $\Delta ilvE$  and the  $\Delta codY$  mutants grew equivalently to WT, showing that  
179 IlvE and CodY are not essential for Lm growth in a nutrient rich environment (Fig. 2A and Table  
180 3). In LDM containing all three BCAAs at 100  $\mu\text{g/mL}$ , the  $\Delta ilvE$  strain grew slightly more  
181 slowly than WT, whereas the  $\Delta codY$  strain grew the same as, or slightly better than, WT (Fig.  
182 2B). Although the  $\Delta ilvE$  culture reached the same maximum density as WT in LDM, its doubling  
183 time during logarithmic growth was about 1.7-fold longer than WT (Table 3). These data reveal  
184 that ai-BCFA synthesis through IlvE contributes to bacterial growth rate when nutrients are  
185 limited. In LDM, the  $\Delta ilvE::ilvE^+$  complemented strain also grew more slowly than WT, despite  
186 the fact that it was able to generate BCFA profiles similar to WT in this medium (Fig. 1B-C). We  
187 therefore asked whether the *ilvE* gene is expressed at WT levels in the complemented strain.  
188 Indeed, RT-qPCR of *ilvE* expression revealed lower transcript levels of this gene in the  
189 complemented strain (Fig. 2C), particularly during exponential growth.

190 Fatty acid distributions (Fig. 1B-C) suggested that mutants lacking IlvE or CodY use Val  
191 and Leu for synthesis of iso-BCFAs at higher levels than WT. Therefore, we asked how  $\Delta ilvE$   
192 and  $\Delta codY$  strains would grow when one or all three of the BCAAs are lacking in the growth  
193 medium, despite having the ability to synthesize all three BCAAs *de novo*. In LDM lacking all  
194 three BCAAs, all four strains grew poorly, with WT and  $\Delta ilvE::ilvE^+$  reaching the highest  
195 optical density at 600 nm (OD<sub>600</sub>) of ~0.4, compared to all strains reading ~0.6 in LDM when  
196 all BCAAs were present (Fig. 2B versus Fig. 3A). Additionally, the  $\Delta ilvE$  mutant exhibited large  
197 variability when no BCAAs were supplied, while  $\Delta codY$  grew the poorest (Fig. 2B versus Fig.  
198 3A). The fact that the  $\Delta codY$  mutant grew so poorly in medium with no exogenous BCAAs was

199 surprising considering that this mutant has no restriction on *de novo* synthesis of BCAAs. These  
200 data support the semi-auxotrophic nature of Lm for BCAAs, highlighting the importance of  
201 exogenous BCAAs for optimal growth and revealing a key role for IlvE and CodY when all  
202 exogenous BCAAs are unavailable.

203 While IlvE is needed for enzymatic incorporation of Ile into BCFAs, CodY specifically  
204 senses and binds cellular Ile (33, 34). Due to their specific relationships with Ile, we then asked  
205 how  $\Delta ilvE$  and  $\Delta codY$  mutants would grow when exogenous Ile is lacking but when Val and Leu  
206 are present. Interestingly, both  $\Delta ilvE$  and  $\Delta codY$  strains were similarly attenuated when only Ile  
207 was lacking, reaching a lower maximum density compared to WT and  $\Delta ilvE::ilvE^+$  strains (Fig.  
208 3B). Again, this was unexpected for the  $\Delta codY$  mutant, since we predicted that the  $\Delta codY$  strain  
209 would have no growth defect in the absence of Ile due to its higher cell associated Ile  
210 concentrations (Fig. 1D-E). These results reveal a complex role for CodY in Ile sensing and  
211 BCAA homeostasis. We conclude that both IlvE and CodY are required for optimal bacterial  
212 growth when exogenous Ile is absent.

213 When either all three BCAAs or only Ile were absent in the growth medium (Fig. 3A-B),  
214 the  $\Delta ilvE$  and  $\Delta codY$  mutants were attenuated for growth to a similar degree. However, in media  
215 containing exogenous Ile but lacking either of the other two BCAAs (Leu or Val), the two  
216 mutants revealed unique growth phenotypes (Fig. 3C-D). In LDM containing Ile and one other  
217 BCAA (Val or Leu), the  $\Delta codY$  mutant grew more robustly than WT, suggesting a dominant role  
218 for Ile in Lm growth when CodY regulation is lacking. But the  $\Delta ilvE$  mutant showed strict  
219 requirements for Leu and Val in the presence of Ile. When only Leu was absent (ie, Ile and Val  
220 present), the  $\Delta ilvE$  mutant grew as it did in normal LDM (with all BCAAs, Fig. 2B) for about 12  
221 hours, but reached stationary phase early and then had a decrease in OD600 (Fig. 3C). When

222 only Val was absent (ie, Ile and Leu present), the  $\Delta ilvE$  strain was entirely unable to grow (Fig.  
223 3D), revealing an absolute requirement for Val when exogenous Ile is not incorporated into ai-  
224 BCFAs by IlvE. The IlvE complemented strain was able to eventually reach a maximum density  
225 in stationary phase similar to that of WT in all of these conditions (Fig. 3A-D), albeit at a slightly  
226 slower rate. Thus, when IlvE is not present, Lm has an increased dependence on Val and Leu for  
227 growth. These data show that while CodY is tightly linked to Ile sensing and homeostasis, IlvE  
228 activity plays a key role in cellular homeostasis when any of the individual BCAAs are lacking  
229 exogenously. Collectively, these growth trends indicate that BCAA levels are controlled at  
230 multiple levels in Lm.

231

### 232 ***Listeria* lacking IlvE exhibit decreased intracellular replication in macrophages and** 233 **reduced cell-to-cell spread**

234 Having established that IlvE and CodY play a role in generating membrane ai-BCFAs  
235 and in promoting optimal growth in BCAA-limited environments, we asked whether these  
236 proteins specifically contribute to Lm pathogenesis. We hypothesized that the  $\Delta ilvE$  mutant  
237 would be less efficient at intracellular growth in a cell culture infection model due to its  
238 relatively slow growth during nutrient restriction. Previously, the  $\Delta codY$  mutant strain has shown  
239 different behaviors in various *in vitro* macrophage infections models (25, 28). Since the  $\Delta codY$   
240 mutant in this study grew robustly in nutrient-limited LDM (Fig. 2B), we predicted that it would  
241 grow similarly to WT in primary macrophages. We also considered that the  $\Delta codY$  mutant would  
242 be deficient in cell-to-cell spread given its stationary phase reduction of ai-BCFAs.

243 We infected primary bone marrow-derived murine macrophages (BMDM) with Lm  
244 strains prepared from mid-log phase LDM cultures and measured viable intracellular bacteria at

245 0, 4 and 8 hours post infection. At 4 and 8 h post-infection, intracellular growth of the  $\Delta ilvE$   
246 mutant was at least 1 log lower than WT (Fig. 4A). However, the  $\Delta ilvE$  strain showed a growth  
247 rate increase after 4 h, suggesting that this strain may be able to adapt to the intracellular  
248 environment. The  $\Delta ilvE::ilvE^+$  strain showed an intermediate phenotype, where intracellular  
249 growth was less than that of WT but greater than that of the  $\Delta ilvE$  mutant. WT and  $\Delta codY$  strains  
250 replicated within primary BMDM equivalently. We conclude that IlvE is required for optimal  
251 growth in the nutrient-limited environment of macrophages, while CodY is not essential for  
252 adaptation to intracellular growth within this cell type.

253 We then infected L929 cells with Lm strains prepared from mid-logarithmic LDM  
254 cultures to assess the requirements for IlvE and CodY during multiple stages of intracellular  
255 infection as measured by cell-to-cell spread (Fig. 4B-C). Plaques formed from infection with the  
256  $\Delta ilvE$  mutant were approximately 66% the size of WT-infected plaques (Fig. 4C). The  
257 complemented  $\Delta ilvE::ilvE^+$  strain had a partially rescued plaque phenotype. We also observed  
258 that plaques formed by the  $\Delta codY$  mutant were not significantly different from those of WT (Fig.  
259 4C). Taken together, these data demonstrate that IlvE is a critical component for Lm intracellular  
260 growth and cell-to-cell spread.

261

## 262 **IlvE enhances bacterial survival in response to exogenous membrane stress**

263 Membrane BCFA content underlies Lm resistance to various cell stresses such as pH,  
264 small molecules, low temperature, and host-specific antimicrobial mechanisms (8, 10, 12, 13, 16,  
265 17, 35). As a foodborne pathogen, Lm must survive the acidic stomach environment and resist  
266 damage from host molecules such as bile. To investigate the role of Ile-dependent BCFA  
267 metabolism in protecting Lm membrane integrity, we tested the ability of  $\Delta ilvE$  and  $\Delta codY$

268 mutants to survive in the presence of membrane disrupting bile salts. We used a bile salt mixture  
269 of cholic acid and deoxycholic acid, which are similar to the emulsifying bile acids in the  
270 mammalian GI tract. We hypothesized that Lm lacking IlvE would be more susceptible to bile  
271 salt stress than WT strains with a full complement of ai-BCFAs. Mid-logarithmic phase bacteria  
272 grown in LDM were exposed to 0, 1, 2 and 4 mg/mL bile salts at 37°C for 30 min and measured  
273 by counting CFU (Fig. 5A). WT Lm showed decreasing viability with increasing bile salt  
274 concentration, with a reduction in viability of almost 2 logs from 0 to 4 mg/mL. The  $\Delta ilvE$   
275 mutant strain showed a consistent 1-log decrease in viability compared to WT at each  
276 concentration. The complemented strain  $\Delta ilvE::ilvE^+$  was slightly less viable at 1 mg/mL, but  
277 was similar to WT at 2 and 4 mg/mL. Lastly, the  $\Delta codY$  mutant showed susceptibility to bile salt  
278 stress similar to that of WT. We therefore conclude that IlvE promotes resilience against  
279 membrane stress, likely through its role in populating the Lm membrane with ai-BCFAs.

280

### 281 **IlvE is required for optimal infection of C57BL/6 mice**

282 While *in vitro* infections can shed light on the intracellular growth capabilities of Lm,  
283 they do not illuminate the more complex physiological dynamics of an animal infection. We  
284 hypothesized that IlvE and CodY would contribute to pathogenesis in a mouse model of  
285 infection, and that the IlvE would have more of an impact due to its constitutive role in  
286 membrane fatty acid synthesis. We used a competitive index (CI) assay to measure the fitness of  
287 Lm strains in C56BL/6 mice (36). Briefly, we injected mice intraperitoneally with a WT Lm  
288 strain that is resistant to erythromycin (WT-erm<sup>r</sup>) combined with a mutant strain (test strain-  
289 erm<sup>s</sup>) in a 1:1 mixture (WT-erm<sup>r</sup> : test strain-erm<sup>s</sup>). After 48 h, spleens and livers were removed  
290 and bacteria plated on LB-agar with or without antibiotic to discern resistant (WT<sup>R</sup>) versus

291 sensitive (test strain<sup>S</sup>) bacteria and calculated the CI. The lower the CI, the less “competitive” the  
292 test strain was compared to WT during infection.

293 In both spleen and liver (Fig. 5B-C), substantially fewer  $\Delta ilvE$  bacteria were recovered.  
294 The mean CI for the  $\Delta ilvE$  strain in both organs was less than 0.2, indicating severe attenuation  
295 in mice. Although the IlvE complemented strain grew better in mice than the deletion mutant, it  
296 was recovered at lower levels than WT, suggesting that robust expression of *ilvE* is necessary for  
297 optimal survival in a whole animal. Lastly, while bacteria lacking CodY showed a CI of ~0.5 in  
298 mouse spleen, a CI of 0.1 in liver suggests that the liver environment is a more restrictive growth  
299 milieu for the  $\Delta codY$  mutant. Overall, these data underline a major role for ai-BCFA metabolism  
300 through IlvE for all aspects of Lm growth and virulence, with CodY playing a major role mainly  
301 during Ile restriction and severe nutrient restriction.

302

## 303 **DISCUSSION**

304

305 The plasma membrane of *Listeria monocytogenes* (Lm) is a major structure of the  
306 bacterial cell surface and a key interface with host cells (3). Understanding how Lm assembles  
307 and remodels membranes to thrive within the host is key to our understanding of this important  
308 pathogen. In this study, we explored how two Isoleucine (Ile) responsive proteins, the  
309 aminotransferase IlvE and the regulator CodY, contribute to growth, plasma membrane  
310 composition, and virulence of Lm. Our findings reveal a crucial role for IlvE in generation of  
311 membrane ai-BCFAs, robust growth during nutrient limitation, protection from membrane stress,  
312 and virulence in cell culture and in mice. Additionally, our work shows that CodY is involved in  
313 modulating membrane ai-BCFA content during stationary phase, and that exogenous Ile is

314 required for bacterial growth when CodY is lacking. However, we observed that CodY is  
315 relevant in the nutrient environment of the liver, but contributes less to bacterial fitness in the  
316 spleen where *Lm* primarily replicates in macrophages. Collectively, our findings point to a  
317 complex role for Ile usage through IlvE in promoting ai-BCFA membrane composition and also  
318 highlight an important relationship between BCAA and ai-BCFA metabolic pathways for *Lm*  
319 pathogenesis.

320 Anteiso-BCFAs are the major component of the *Lm* plasma membrane, and the  
321 aminotransferase IlvE incorporates Ile into ai-BCFA biosynthesis (Fig. 1) (15, 18). Our main  
322 finding that IlvE is a crucial element of *Lm* biology and virulence is supported first by the  
323 observation that bacteria lacking this enzyme ( $\Delta ilvE$ ) are severely restricted for growth under  
324 multiple conditions of nutrient limitation. Since *Lm* is an intracellular pathogen, and the  
325 intracellular environment is a nutrient-restricted medium (23), *Lm* must have strategies for  
326 acquiring or synthesizing critical metabolites, such as BCAAs, during infection (2, 23). Notably,  
327 IlvE was not required for optimal growth in rich-undefined medium, showing that Ile  
328 incorporation into ai-BCFAs is not necessary when exogenous nutrients are in great abundance.  
329 Rather, IlvE was critically needed for axenic growth during BCAA limitation, in particular when  
330 only exogenous Valine or Leucine was unavailable, underscoring the central importance of Ile  
331 for membrane metabolism.

332 Our results also highlight the complex nature of BCAA metabolism in *Lm*, which is  
333 somewhat curious, since these bacteria are able to synthesize BCAA endogenously but still  
334 require exogenous BCAAs for optimal growth (22, 26). *Lm* expresses BCAA biosynthetic genes  
335 during infection (26), indicating BCAA limitation within cells. Recent investigation into this  
336 phenomenon has revealed that while the Ile-binding regulatory protein CodY inhibits BCAA

337 synthesis when Ile is abundant, the bacteria also limit BCAA synthesis through Rli60 even when  
338 CodY inhibition is relieved during Ile restriction, as within the host (21). These opposing  
339 processes allow the bacteria to fine-tune Ile levels in order to satisfy BCAA requirements for  
340 growth while also allowing virulence gene expression (21). We showed that bacteria lacking  
341 CodY or IlvE were severely attenuated for growth when Ile was not available in the medium,  
342 highlighting a central role for exogenous Ile during growth. But bacteria lacking CodY harbored  
343 more cell-associated BCAAs during growth in nutrient-limited LDM, strongly suggesting a  
344 constitutive increase in endogenous BCAA synthesis when CodY inhibition is completely  
345 lacking. Thus, the  $\Delta codY$  mutant's poor growth in the absence of Ile was unexpected, since these  
346 bacteria have a greater Ile pool most likely due to *de novo* synthesis. Moreover, the highly robust  
347 growth of the  $\Delta codY$  mutant when exogenous Ile and one other BCAA were available  
348 underscores a vital role for exogenous Ile in the fine-tuning of BCAA metabolism through  
349 CodY, perhaps through involvement in controlling BCAA transport as in *Bacillus subtilis* (27).  
350 Collectively, these findings suggest that within the nutrient-restricted intracellular environment,  
351 Lm must be able to access sufficient Ile for ai-BCFA synthesis through IlvE activity, but must  
352 also sense relative Ile limitation such that CodY metabolic inhibition is relieved to support  
353 endogenous BCAA generation for optimal growth.

354 Another line of evidence pointing to the critical nature of IlvE in Lm biology is its major  
355 role in supporting production of resilient membranes during nutrient restriction at biological  
356 temperatures (37°C). The importance of ai-BCFA membrane content for resistance to cold has  
357 been well established for Lm, and indeed Lm is able to modulate the percentage of ai-BCFAs in  
358 response to temperature, salinity, and pH (8, 15-17). However, the Lm membrane is always  
359 predominantly made up of Ile-primed odd-numbered ai-BCFAs, emphasizing the central



360 importance of the Ile-to-ai-BCFA biosynthetic pathway for this pathogen. Our demonstration  
361 that bacteria lacking IlvE have greatly reduced ai-BCFA content and are sensitive to bile salts  
362 directly implicates Ile usage by IlvE as a major player in synthesizing resilient bacterial  
363 membranes. Within host cells, Lm is subjected to a variety of membrane-targeting host defenses  
364 such as antimicrobial peptides, and ai-BCFAs have been shown to be important for resistance to  
365 these mechanisms when the enzyme branched-chain  $\alpha$ -keto acid dehydrogenase (BKD),  
366 downstream of IlvE, is lacking (13). While those stresses are experienced by Lm inside host  
367 cells, Lm is a foodborne pathogen, and so must also survive the low pH of the stomach and the  
368 high concentration of bile acids in the small intestine (37, 38). A lifestyle-specific evolution of  
369 ai-BCFA metabolism is evident in the Gram-positive dental pathogen *Streptococcus mutans*,  
370 which requires IlvE for acid tolerance, such as might be experienced in the oral cavity (39).  
371 Thus, the contribution of IlvE for bile salt resistance in Lm reveals that a major need for Ile and  
372 ai-BCFAs evolved as a fundamental physiological feature for surviving stress within the diverse  
373 environments that this pathogen experiences. Further exploration into the mechanism of bile salt  
374 resistance may reveal membrane structural features and bile salt transport mechanisms as playing  
375 key roles.

376         The central importance for IlvE was also revealed by the severe attenuation of the  $\Delta ilvE$   
377 strain in cell culture and in a mouse model of listeriosis. As mentioned previously, the  
378 intracellular milieu is nutrient-restricted and a site of antimicrobial assault. Thus, the decrease in  
379 intracellular growth of Lm lacking IlvE after four hours of macrophage infection is likely due to  
380 enhanced microbial killing, as was seen in the BKD mutant (13). However, it should be noted  
381 that the  $\Delta ilvE$  mutant established growth macrophages between 4 and 8 hours, which may  
382 indicate a regulatory stress response when Ile incorporation into ai-BCFAs is compromised. This

383 observation, combined with the fact that the  $\Delta ilvE$  mutant still had 20-30% ai-BCFAs during  
384 growth in LDM, hints at the presence of another transaminase that can use Ile for ai-BCFA  
385 synthesis. Different from what we observed, an Lm mutant lacking *ilvE* in a different parental  
386 strain background was almost entirely lacking in ai-BCFAs when grown in rich medium, well  
387 under 10% of fatty acid content (14), and this could mean that Lm has several regulatory  
388 strategies for membrane homeostasis depending on the nutritional content of the growth medium.  
389 However, the amount of ai-BCFAs that we observed in the absence of IlvE was not sufficient for  
390 full virulence in a whole animal, highlighting the necessity of IlvE mediated ai-BCFA synthesis  
391 for membranes during infection.

392         Lastly, our results also shed light on the complexity of CodY regulation, which in  
393 addition to BCAA metabolism, is also known to be involved in nitrogen and carbon assimilation  
394 and regulation of Lm virulence gene expression (21, 25, 27). Previous studies of  $\Delta codY$  mutants  
395 in *in vitro* macrophage models have shown different results, where CodY was not required for  
396 growth in a transformed macrophage line (25), but was required for optimal growth within  
397 primary macrophages (26). In our study, we did not observe a defect in growth within primary  
398 macrophages for the  $\Delta codY$  mutant. But note that while the  $\Delta codY$  mutant had an identical fatty  
399 acid profile to WT during logarithmic growth, it showed a significant reduction in ai-BCFAs  
400 during stationary phase: and for our macrophage experiments, we used  $\Delta codY$  cultures that were  
401 prepared at mid-logarithmic phase grown in nutrient-limited medium. This parameter may have  
402 poised the bacteria to be more resistant to macrophage killing during the brief, 8-hour duration of  
403 the experiment, and this possibility is currently being explored. Regardless, our data are the first  
404 to describe a role for CodY in Lm pathogenesis in a whole animal model, where the  $\Delta codY$   
405 mutant was attenuated predominantly in the mouse liver.

406           In this study, we determined that the branched-chain amino acid transaminase IlvE plays  
407 a central role in the membrane dynamics of *L. monocytogenes* and is necessary for robust  
408 replication during intracellular infection *in vitro* and *in vivo*. Collectively, our findings highlight  
409 an intricate connection between BCAA and BCFA metabolism, and further support a model  
410 where Ile is a key metabolite for bacterial growth and virulence, in particular through the activity  
411 CodY. Future investigation into how Lm remodels its membrane during interactions with the  
412 host will expand our understanding of how pathogens use this defining cellular structure to  
413 enhance infection.  
414

415 **FIGURE LEGENDS**

416

417 **Figure 1. Changes in Fatty Acid and BCAA content in Lm lacking *IlvE* or *CodY*.** (A)

418 Simplified overview of branched chain fatty acid (BCFA) biosynthesis in Gram-positive bacteria

419 (based on detailed diagram in (9)) showing pathways that incorporate branched chain amino

420 acids (BCAAs: Ile, Leu & Val). Red X represents points in pathways where deletion mutants

421 were used in this study. Colored arrows indicate pathways of individual BCAAs that are

422 incorporated into final BCFA isoforms (18). Purple text = enzyme names. (B and C) Graphs

423 represent the relative amounts of the major fatty acids as a percentage of total fatty acids

424 contained in Lm cultures of WT,  $\Delta ilvE$ ,  $\Delta ilvE::ilvE^+$  and  $\Delta codY$  strains grown in nutrient

425 limiting medium (LDM) to (B) mid-logarithmic and (C) stationary phase. Graphs represent

426 combined data from three independent experiments. Graphs shown here and data in Tables 2 and

427 3 are the combined quantities of odd numbered (C15 and C17) or even-numbered (C14 and C16)

428 BCFAs. Individual numbered species (e.g., ai-C15 only) and all other fatty acids are in

429 Supplemental Tables S3 and S4. (D and E). Cultures of WT,  $\Delta ilvE$ ,  $\Delta ilvE::ilvE$  and  $\Delta codY$

430 strains grown in LDM to (D) mid-logarithmic and (E) stationary phase were analyzed by mass

431 spectrometry. Concentrations of BCAAs were normalized to total protein content and are shown

432 as ratios relative to WT. Error bars show the range of fold difference compiled from 2

433 independent experiments.

434

435 **Figure 2. Growth of  $\Delta ilvE$  and  $\Delta codY$  mutants in rich and nutrient-limited medium.**

436 Bacterial growth of WT (circles),  $\Delta ilvE$  (triangles),  $\Delta ilvE::ilvE^+$  (inverted triangles), and  $\Delta codY$

437 (squares), was analyzed on a Bioscreen instrument. Samples were inoculated from recovered

438 frozen cultures that had been prepared in LDM to mid-logarithmic phase. Optical Density at 600  
439 nm (OD600) was measured for 24 hours at 37°C with shaking. Experiments include growth in  
440 (A) Rich medium = Brain Heart Infusion (BHI) and (B) LDM containing amino acids at 100  
441 µg/mL. Data are compiled from three independent experiments with three technical replicates  
442 per experiment. Each point is the mean with error bars representing the Standard Deviation. (C)  
443 RT-qPCR analysis of *ilvE* expression in Lm grown in LDM to logarithmic (left) and stationary  
444 (right) phase.

445

446 **Figure 3. Growth of Lm in LDM with variable exogenous BCAAs.** Bacterial growth of WT  
447 (circles),  $\Delta ilvE$  (triangles),  $\Delta ilvE::ilvE^+$  (inverted triangles), and  $\Delta codY$  (squares), performed as  
448 in Figure 2, but in LDM containing (A) no BCAAs, (B) no Ile (Val & Leu only), (C) no Leu (Ile  
449 & Val only), and (D) no Val (Ile & Leu only). Data are compiled from three independent  
450 experiments with three technical replicates per experiment. Each point is the mean with error  
451 bars representing standard deviation.

452

453 **Figure 4. IlvE is required for optimal growth in macrophages and for cell-to-cell spread in**  
454 **cell culture.** (A) Total CFU from survival assays of Lm infection of Bone Marrow Derived  
455 Macrophages (BMDM) assessed at 0.5, 4 and 8h post-infection. Data are compiled from three  
456 independent experiments showing mean and standard deviation. MOI = 1. (B-C) Plaque assay of  
457 Lm grown in L9 fibroblasts. (B) Representative image of plaques formed by WT &  $\Delta ilvE$   
458 bacteria after 48h growth. (C) Average plaque diameters from experiments that included WT,  
459  $\Delta ilvE$  and  $\Delta ilvE::ilvE^+$  (left) or WT and  $\Delta codY$  (right). Numbers below graphs are the mean

460 plaque diameter with standard deviation compiled from three independent experiments. Two-  
461 tailed *t*-test comparing mutants to WT, \*\*\*\* $P < 0.0001$ ; ns = not significant.

462

463 **Figure 5. *IlvE* is required for resistance to membrane stress in response to bile salts and for**

464 **survival in a mouse model of listeriosis.** (A) Log-phase bacteria grown in LDM were added to

465 PBS with 0, 1, 2 and 4 mg/mL Bile Salts (Cholic acid-Deoxycholic acid sodium salt mixture)

466 and incubated at 37°C for 30 minutes. Input for all samples was  $\sim 10^7$  CFU/mL. Data are

467 compiled from three independent experiments. One-way ANOVA (non-parametric) with Dunn's

468 multiple comparisons post-test comparing mutant strains to WT. ns = not significant; \* $P < 0.05$ ;

469 \*\*\* $P < 0.001$ ; \*\*\*\* $P < 0.0001$ . (B and C) Female C56BL/6 mice were infected with a 1:1 mixture

470 of erythromycin-sensitive test strains and erythromycin-resistant WT strain via intraperitoneal

471 injection. After 48h infection, (B) spleens and (D) livers were harvested and assessed for viable

472 CFU and competitive index (CI) was calculated as the ratio of Sensitive/Resistant CFU. Data

473 represent two independent experiments with total  $n=7$  mice for all strains except WT, which was

474  $n=8$ . LOD = limit of detection.

475

476 **TABLES**

477

478 **Table 1. Fatty Acid Content of *L. monocytogenes* during Logarithmic Growth in LDM**

|                       | <b>Percent of Total Fatty Acid Content – Logarithmic Growth</b> |                     |                                       |                     |
|-----------------------|-----------------------------------------------------------------|---------------------|---------------------------------------|---------------------|
|                       | <b>Mean Percent (SD)</b>                                        |                     |                                       |                     |
|                       | <b>WT</b>                                                       | <b><i>ΔilvE</i></b> | <b><i>ΔilvE::ilvE<sup>+</sup></i></b> | <b><i>ΔcodY</i></b> |
| <b>Other</b>          | 0.95 (0.20)                                                     | 7.41 (3.58)         | 6.72 (9.05)                           | 1.91 (0.54)         |
| <b>anteisoC15:C17</b> | 88.56 (0.30)                                                    | ****29.67 (13.54)   | 84.67 (8.76)                          | 86.41 (1.44)        |
| <b>isoC15:C17</b>     | 9.60 (0.30)                                                     | ****37.06 (6.15)    | 6.85 (1.80)                           | 7.43 (1.36)         |
| <b>isoC14:C16</b>     | 0.89 (0.11)                                                     | ****25.86 (9.50)    | 1.76 (0.61)                           | 4.24 (0.86)         |

479 Two-Way ANOVA using Dunnett's Multiple Comparisons Test (compare rows within columns)

480 compared to Wild Type (WT). \*\*\*\* $P < 0.0001$ .

481

482 **Table 2. Fatty Acid Content of *L. monocytogenes* during Stationary Phase in LDM**

|                       | Percent of Total Fatty Acid Content – Stationary Phase |                  |                     |                  |
|-----------------------|--------------------------------------------------------|------------------|---------------------|------------------|
|                       | Mean Percent (SD)                                      |                  |                     |                  |
|                       | WT                                                     | $\Delta ilvE$    | $\Delta ilvE::ilvE$ | $\Delta codY$    |
| <b>Other</b>          | 1.65 (0.44)                                            | *8.86 (1.85)     | 1.53 (0.21)         | 4.84 (3.27)      |
| <b>anteisoC15:C17</b> | 83.87 (2.76)                                           | ****21.06 (4.14) | 85.55 (3.53)        | ****62.75 (8.89) |
| <b>isoC15:C17</b>     | 12.26 (2.09)                                           | ****36.87 (1.23) | 8.32 (2.23)         | 10.44 (2.69)     |
| <b>isoC14:C16</b>     | 2.22 (0.66)                                            | ****33.22 (5.51) | 4.60 (3.75)         | ****21.97 (3.03) |

483 Two-Way ANOVA using Dunnett's Multiple Comparisons Test (compare rows within columns)

484 compared to Wild Type (WT). \* $P < 0.05$ ; \*\*\*\* $P < 0.0001$

485 Data are combined from n = 3 experiments

486

487 **Table 3. <sup>1</sup>Doubling times of *L. monocytogenes* strains in small volume growth analysis in**  
 488 **rich (BHI) and nutrient-limiting (LDM) medium.**

|            | WT                   | $\Delta ilvE$ | $\Delta ilvE::ilvE^+$ | $\Delta codY$ |
|------------|----------------------|---------------|-----------------------|---------------|
|            | Mean (SD) in minutes |               |                       |               |
| <b>BHI</b> | 65.9 (5.9)           | 71.0 (2.3)    | 59.5 (18.1)           | 63.8 (3.3)    |
| <b>LDM</b> | 118.5 (5.9)          | 196.1 (17.0)  | 204.9 (13.9)          | 110.9 (6.5)   |

489 <sup>1</sup>Calculated per (40). Data are combined from n = 4 independent experiments combined

490

491



## 492 MATERIALS AND METHODS

493

### 494 Bacteria, cell culture and media

495 *Listeria monocytogenes* strains used in this study are listed in Supplemental Table S1.  
496 Wild Type (WT) *L. monocytogenes* is 10403S and all mutants indicated were created using this  
497 parental background. Bacteria were grown in either BHI or LDM (29). Briefly, LDM contains  
498 the following final concentrations: 50 mM MOPS/2 mM K<sub>2</sub>HPO<sub>4</sub> (pH 7.5), 0.02%  
499 MgSO<sub>4</sub>\*7H<sub>2</sub>O, 0.5 mM Ca(NO<sub>3</sub>)<sub>2</sub>, 0.2% NH<sub>4</sub>Cl, 0.5% Glucose, 0.004% FeCl<sub>3</sub>/Na<sub>3</sub>-  
500 Citrate\*2H<sub>2</sub>O, 0.5 µg/mL Riboflavin, 1 µg/mL Thiamine-HCl, 0.5µg/mL Biotin, 0.005µg/mL  
501 Lipoic Acid, 100 µg/mL of the amino acids Isoleucine, Leucine, Valine, Methionine, Arginine,  
502 Histidine-HCl, Cysteine-HCl. Bone marrow derived murine macrophages (BMDM) were  
503 isolated from wild type C57BL/6 mice per standard conditions and frozen in liquid nitrogen. The  
504 day before *in vitro* infections, cells were thawed, spun by centrifugation, and resuspended in  
505 fresh DMEM-10 (Gibco DMEM #11995-065 with 4.5 g/L D-Glucose and 110 mg/L Sodium  
506 Pyruvate, 10% Fetal Bovine Serum [HyClone], 1% HEPES [Gibco 1M 15630-080], 1% Non-  
507 Essential Amino Acids [Gibco 100X 11140-050] and 1% L-Glutamine [Gibco 200 mM 25030-  
508 081]).

509

### 510 Creation of mutant strains

511 The markerless, in-frame  $\Delta ilvE$  mutant was constructed using the pKSV7 recombination  
512 plasmid (41) per standard conditions such that 1,020 base pairs of the coding sequence were  
513 excised. The gene LMRG\_02078 sequence in biocyc.org was used for mutant deletion method  
514 design. The complemented strain  $\Delta ilvE::ilvE^+$  was constructed using the  $\Delta ilvE$  parental strain by

515 inserting the coding sequence for LMRG\_02078, including 500 base pairs upstream of the start  
516 codon, using the shuttle integration vector pPL2 (42) per standard procedures. Note that two  
517 independent complemented strains were constructed, one with a FLAG tag inserted at the 5' end  
518 of the gene ( $\Delta ilvE::ilvE$ -FL). Primer sequences are listed in Supplementary Table S2.

519 The *codY* null mutant was created by insertion-deletion of a *spc* gene originating from the  
520 plasmid pJL73 (43). The entire *codY* coding sequence was replaced, in the same orientation, by  
521 the spectinomycin resistance cassette using the shuttle vector pMAD (44) per standard  
522 procedures. A more detailed description of construction of the *codY* null mutant, including  
523 primer sequences, will be included in an upcoming manuscript prepared by T.A. Washington, B.  
524 R. Belitsky, and A. L. Sonenshein.

525

## 526 **Growth and survival analysis**

527 Cultures of all strains were grown in liquid LDM or BHI medium to Optical Density 600  
528 nm (OD<sub>600</sub>) 0.40 – 0.50 and frozen at -80°C in 1 mL aliquots. Frozen stocks were titered for  
529 viable bacteria, and on the day of experiments, aliquots were thawed at 37°C for five minutes  
530 and shaken at 37°C in fresh medium for 30 minutes. Bacteria were then diluted 1:10 into fresh  
531 medium and added to a Bioscreen C honeycomb 100-well plate in a 300 µL volume in triplicate.  
532 Plates were incubated at 37°C for 24 hours with constant shaking at medium speed. OD<sub>600</sub>  
533 readings were taken every 15 minutes on the Bioscreen C instrument. Growth was graphed in  
534 Prism. Doubling times were calculated per (40) as follows:  $n = [\log_{10}(\text{high OD}_{600}) - \log_{10}(\text{low}$   
535  $\text{OD}_{600})] / 0.3010$  (where OD<sub>600</sub> values are from exponentially dividing cells). Doubling time =  
536 time between OD<sub>600</sub> / n.

537 Survival during exposure to Bile Salts was performed as follows. Strains were thawed  
538 from frozen stocks of bacteria grown to mid-log (OD600 ~0.45) in LDM, added to fresh LDM,  
539 and shaken at 37°C for 30 min. Bacteria (~10<sup>7</sup> bacteria/mL) were then added to 4 mL of PBS  
540 containing Bile Salts (Sigma #48305) at 0, 1, 2 and 4 mg/mL. Tubes were shaken at 37°C for 30  
541 min and then serially diluted with plating on LB-agar plates.

542

### 543 **Fatty Acid Content**

544 Bacteria were grown in LDM to mid-log (OD600 0.4-0.5) and stationary phase (OD600  
545 0.9 – 1.1), spun by centrifugation, washed 1X with PBS, spun again, and frozen at -20°C. Cells  
546 were sent on dry ice to Microbial ID for Whole Cell Fatty Acid Analysis. Experiments were  
547 performed three times, independently. Results were combined and graphed in Prism 7 or 8 with  
548 standard deviation.

549

### 550 **Amino Acid Analysis**

551 Strains grown on BHI agar were used to inoculate fresh liquid LDM and were grown to  
552 mid-log (OD600 0.45 – 0.55) or stationary phase (OD600 > 0.8). Cultures (12 or 10 mL) were  
553 spun by centrifugation and washed one time with 2 mL 150 mM Ammonium Acetate. Cells were  
554 again spun by centrifugation, the supernatant was removed, and cell pellets were snap frozen in a  
555 dry ice-ethanol bath. Cells were stored at -80°C until delivery to the Michigan Regional  
556 Comprehensive Metabolomics Resource Core (MRC2) at the University of Michigan and  
557 analyzed for total amino acid content as follows. Briefly, cells were homogenized in 200 µL of  
558 extraction solvent (20% water, 80% 1:1:1 methanol:acetonitrile:acetone) containing 13C or 15N-  
559 labeled amino acid internal standards. Samples were incubated at 4°C for 10 min, vortexed, and

560 spun by centrifugation at 4°C for 10 min at 14,000 rpm. Samples were diluted 20-fold and  
561 transferred to autosampler vials for mass spectrometric analysis. Chromatographic separation of  
562 underivatized amino acids was done using an Intrada Amino Acid column (Imtakt USA). Mobile  
563 phases for separation were water:acetonitrile (8:2 v/v) containing 100 mM ammonium formate  
564 (solvent A) and acetonitrile with 0.3% formic acid (solvent B). Flow rate was 0.6 ml/min, and  
565 sample injection volume was 5 µL. ESI-MS/MS data acquisition was performed in positive ion  
566 mode on an Agilent 6410 LC-MS with MRM transitions programmed for both labeled and  
567 unlabeled internal standards. A pooled plasma reference sample and “test pooled” sample were  
568 included as quality controls. Calibration standards were prepared containing all 20 proteinogenic  
569 amino acids at various concentrations and analyzed in replicate along with test samples. LC-MS  
570 data were processed using MassHunter Quantitative Analysis software version B.07.00. Amino  
571 acids were quantified as pmol/million cells (ascertained by serial dilution and plating) and as  
572 pmol/µg total protein using linear calibration curves generated from the standards listed above.  
573 All peak areas in samples and calibration standards were first normalized to the peak area of the  
574 internal standards.

575

#### 576 **In vitro bone marrow derived macrophage infections**

577 Bone marrow derived macrophages (see Bacteria, cell culture and media) were thawed  
578 and plated in 24-well tissue culture plates with  $2.5 \times 10^5$  cells/well and allowed to recover  
579 overnight (~18 hours) at 37°C/5% CO<sub>2</sub>. Following recovery, medium was removed and replaced  
580 with 500 µL of DMEM (no antibiotics) containing bacteria (prepped as in Growth Curve  
581 analysis) at Multiplicity of Infection (MOI) of one. BMDM with bacteria were incubated for 30  
582 min at 37°C/5% CO<sub>2</sub> and then washed three times with warm DPBS++ (+Calcium and

583 +Magnesium Chloride – Gibco 14040). One mL fresh DMEM-10 with Gentamicin (50 µg/mL)  
584 was added to cells to kill extracellular bacteria. Cells were incubated for 0, 4 and 8 hours. At  
585 time of harvest, cells were washed one time with DPBS++ and then incubated in 1 mL of 0.1%  
586 Triton-X for 5 min. Cells were removed by scraping and pipetting and then transferred to 3.5  
587 mL sterile double distilled water and vortexed for 10s. 500 µL 10X PBS was added to promote  
588 bacterial integrity. Samples were either directly plated or serially diluted and then plated on LB-  
589 agar plates and incubated overnight at 37°C. Experiments were done with three technical  
590 replicates per experiment on three separate days. Data were compiled and graphed in Prism 7 or  
591 8.

592

### 593 **In vivo mouse experiments**

594 Mouse experiments were performed with 6 to 7-week-old female BALB/c mice. Bacteria  
595 were grown in BHI to OD600 0.50 and frozen in 1 mL aliquots. On the day of experiments,  
596 bacteria were thawed and resuspended in 3 mL of fresh BHI and incubated with shaking for 1.5  
597 hours at 37°C. Bacteria were pelleted by centrifugation, washed one time with sterile PBS,  
598 pelleted again, and then resuspended in 1 mL sterile PBS. Bacteria were serially diluted and  
599 plated to ascertain original titer. Bacteria were then combined in the following strain  
600 combinations in a 1:1 ratio to attain a concentration of  $10^5$  CFU of each strain per 100 µL of  
601 PBS. WT-erm<sup>r</sup>:WT-erm<sup>s</sup>; WT-erm<sup>r</sup>: $\Delta ilvE$ -erm<sup>s</sup>; WT-erm<sup>r</sup>: $\Delta ilvE::ilvE^+$ -erm<sup>s</sup>; WT-erm<sup>r</sup>: $\Delta codY$ -  
602 erm<sup>s</sup>. Mice were injected peritoneally with 100 µL of bacterial inoculum. Inocula for all strain  
603 combinations were serially diluted and plated on LB-agar and LB-agar-erythromycin plates to  
604 measure INPUT concentrations. Mice were then housed for 48 hours in biocontainment rooms  
605 before sacrifice and harvest of spleens and livers. Spleens were homogenized in 1 mL sterile

606 PBS with 1.0 mm Zirconia/Silica beads (BioSpec 11079110z), and livers were homogenized in 5  
607 mL sterile PBS with a handheld tissue homogenizer. Samples were serially diluted and plated in  
608 duplicate on both non-antibiotic containing LB agar plates and LB agar plates containing  
609 erythromycin. CFU/mL per gram of tissue were obtained for all samples sets post-harvest  
610 (OUTPUT), and the number of antibiotic sensitive and resistant bacteria were obtained by [CFU  
611 on LB plates] minus [CFU on erythromycin-containing plates] = sensitive bacteria. Ratios of  
612 erm-sensitive to erm-resistant bacteria for both INPUT and OUTPUT were calculated, and the  
613 Competitive index was calculated as OUTPUT ratio / INPUT ratio (36). Mouse experiments  
614 were performed on two separate days with n = 3 and n = 4 mice per experiment.

615

#### 616 **L929 Plaque Assay**

617 L929 cells (mouse fibroblast cells) were grown in DMEM-10 medium (see “cell culture”  
618 above) medium and plated in 6-well tissue culture plates at  $10^5$  cells/well at 37°C/5% CO<sub>2</sub> until  
619 cells were almost 100% confluent. On the day of experiments, medium was removed and  
620 replaced with fresh medium containing Lm at MOI = 30, incubated for 1h at 37°C/5% CO<sub>2</sub>, and  
621 washed three times with DPBS++ (plus ions). A 1:1 agarose (1.4%):2X DMEM overlay was  
622 then added to each well. Plates were incubated at 37°C/5% CO<sub>2</sub> until plaques were visible.  
623 Neutral red mixed with PBS was added to the wells for 1 h to allow for visualization of plaques.  
624 After plaques were visible, images of each plate were taken (with a ruler included in the picture),  
625 and plaque diameter was measured in ImageJ using the ruler in millimeters (mm) as a standard.  
626 At least ten plaques were measured in three separate wells for each of three independent  
627 experiments performed on different days. Data were compiled, the mean and standard deviation

628 calculated, and the Student's unpaired, two-tailed *t*-test was used to compare mutant strains to  
629 WT. Data are shown as the mean plaque diameter percentage of WT per each experiment.

630

### 631 **Gene expression via RT-qPCR**

632 Bacteria were grown in LDM to mid-log (OD<sub>600</sub> 0.4-0.5) and stationary phase (OD<sub>600</sub>  
633 0.9 – 1.1) and then spun by centrifugation. After lysis by bead-beating, total bacterial RNA was  
634 isolated using either the “Quick-RNA Fungal/Bacterial Miniprep” (Zymo Research #R2014) or  
635 the “FastRNA Blue Kit” (MPBio #116025-050). RNA was extracted per manufacturers’  
636 protocols and treated with DNase. RNA was precipitated using isopropanol and quantitated on a  
637 Nanodrop ND-1000 spectrophotometer. cDNA was made using 250 ng RNA with Invitrogen  
638 SuperScript II RT per the manufacturer’s protocol. No-RT controls were created for each RNA  
639 sample by omitting RT in cDNA prep. To measure relative gene expression, 1 μL of cDNA was  
640 used for SYBR green qPCR using Brilliant II SYBR Green QPCR Master Mix with Low ROX  
641 (Agilent #600830) in Bio-Rad Hard Shell PCR 96-well plates (Bio-Rad #64201794) with all  
642 cDNA preps done in duplicate, including all no-RT controls. Plates were run on a Bio-Rad  
643 CFX96 Real-Time System Thermal Cycler with the following protocol: 10 min at 95°C, 40X  
644 cycle of [10s 95°C; 45s 53°C; 1 min 72°C], 30s 95°C, 30s 65°C, 30s 95°C. The *L.*  
645 *monocytogenes* genes *ilvE* (*LMRG\_02078*) and *gyrA2* were measured, and *gyrA2* was used as a  
646 housekeeping gene for data normalization. Primer sequences are listed in Supplemental Table  
647 S2. Changes in gene expression were calculated per the  $2^{-\Delta\Delta Ct}$  method (45) comparing mutants  
648 to WT.

649

650 **ACKNOWLEDGMENTS**

651 This work was funded by NIH R01 AI109048. The authors acknowledge Microbial ID for Fatty  
652 Acid analysis and the Michigan Regional Comprehensive Metabolomics Core at the University  
653 of Michigan for amino acid analysis. Some Illustrations were partially generated in Biorender  
654 ([www.biorender.com](http://www.biorender.com)).

655

656

657



658 **REFERENCES**

- 659 1. **Freitag NE, Port GC, Miner MD.** 2009. *Listeria monocytogenes* - from saprophyte to  
660 intracellular pathogen. *Nat Rev Microbiol* **7**:623-628.
- 661 2. **Radoshevich L, Cossart P.** 2018. *Listeria monocytogenes*: towards a complete picture of  
662 its physiology and pathogenesis. *Nat Rev Microbiol* **16**:32-46.
- 663 3. **King JE, Roberts IS.** 2016. Bacterial Surfaces: Front Lines in Host-Pathogen  
664 Interaction. *Adv Exp Med Biol* **915**:129-156.
- 665 4. **Pizarro-Cerda J, Cossart P.** 2018. *Listeria monocytogenes*: cell biology of invasion and  
666 intracellular growth. *Microbiol Spectr* **6**.
- 667 5. **Carvalho F, Sousa S, Cabanes D.** 2014. How *Listeria monocytogenes* organizes its  
668 surface for virulence. *Front Cell Infect Microbiol* **4**:48.
- 669 6. **Raines LJ, Moss CW, Farshtchi D, Pittman B.** 1968. Fatty acids of *Listeria*  
670 *monocytogenes*. *J Bacteriol* **96**:2175-2177.
- 671 7. **Kaiser JC, Heinrichs DE.** 2018. Branching Out: Alterations in Bacterial Physiology and  
672 Virulence Due to Branched-Chain Amino Acid Deprivation. *MBio* **9**.
- 673 8. **Annous BA, Becker LA, Bayles DO, Labeda DP, Wilkinson BJ.** 1997. Critical role of  
674 anteiso-C15:0 fatty acid in the growth of *Listeria monocytogenes* at low temperatures.  
675 *Appl Environ Microbiol* **63**:3887-3894.
- 676 9. **Zhu K, Ding X, Julotok M, Wilkinson BJ.** 2005. Exogenous isoleucine and fatty acid  
677 shortening ensure the high content of anteiso-C15:0 fatty acid required for low-  
678 temperature growth of *Listeria monocytogenes*. *Appl Environ Microbiol* **71**:8002-8007.
- 679 10. **Giotis ES, McDowell DA, Blair IS, Wilkinson BJ.** 2007. Role of branched-chain fatty  
680 acids in pH stress tolerance in *Listeria monocytogenes*. *Appl Environ Microbiol* **73**:997-  
681 1001.
- 682 11. **Keeney K, Colosi L, Weber W, O'Riordan M.** 2009. Generation of branched-chain  
683 fatty acids through lipoate-dependent metabolism facilitates intracellular growth of  
684 *Listeria monocytogenes*. *J Bacteriol* **191**:2187-2196.
- 685 12. **Sun Y, O'Riordan MX.** 2010. Branched-chain fatty acids promote *Listeria*  
686 *monocytogenes* intracellular infection and virulence. *Infect Immun* **78**:4667-4673.
- 687 13. **Sun Y, Wilkinson BJ, Standiford TJ, Akinbi HT, O'Riordan MX.** 2012. Fatty acids  
688 regulate stress resistance and virulence factor production for *Listeria monocytogenes*. *J*  
689 *Bacteriol* **194**:5274-5284.
- 690 14. **Rogiers G, Kebede BT, Van Loey A, Michiels CW.** 2017. Membrane fatty acid  
691 composition as a determinant of *Listeria monocytogenes* sensitivity to trans-  
692 cinnamaldehyde. *Res Microbiol* **168**:536-546.
- 693 15. **Chihib NE, Ribeiro da Silva M, Delattre G, Laroche M, Federighi M.** 2003. Different  
694 cellular fatty acid pattern behaviours of two strains of *Listeria monocytogenes* Scott A  
695 and CNL 895807 under different temperature and salinity conditions. *FEMS Microbiol*  
696 *Lett* **218**:155-160.
- 697 16. **Zhu K, Bayles DO, Xiong A, Jayaswal RK, Wilkinson BJ.** 2005. Precursor and  
698 temperature modulation of fatty acid composition and growth of *Listeria monocytogenes*  
699 cold-sensitive mutants with transposon-interrupted branched-chain alpha-keto acid  
700 dehydrogenase. *Microbiology* **151**:615-623.
- 701 17. **Singh AK, Zhang YM, Zhu K, Subramanian C, Li Z, Jayaswal RK, Gatto C, Rock**  
702 **CO, Wilkinson BJ.** 2009. FabH selectivity for anteiso branched-chain fatty acid

- 703 precursors in low-temperature adaptation in *Listeria monocytogenes*. *FEMS Microbiol*  
704 *Lett* **301**:188-192.
- 705 18. **Kaneda T.** 1991. Iso- and anteiso-fatty acids in bacteria: biosynthesis, function, and  
706 taxonomic significance. *Microbiol Rev* **55**:288-302.
- 707 19. **Zhang YM, Rock CO.** 2008. Membrane lipid homeostasis in bacteria. *Nat Rev*  
708 *Microbiol* **6**:222-233.
- 709 20. **Eisenreich W, Slaghuis J, Laupitz R, Bussemer J, Stritzker J, Schwarz C, Schwarz**  
710 **R, Dandekar T, Goebel W, Bacher A.** 2006. <sup>13</sup>C isotopologue perturbation studies of  
711 *Listeria monocytogenes* carbon metabolism and its modulation by the virulence regulator  
712 PrfA. *Proc Natl Acad Sci U S A* **103**:2040-2045.
- 713 21. **Brenner M, Lobel L, Borovok I, Sigal N, Herskovits AA.** 2018. Controlled branched-  
714 chain amino acids auxotrophy in *Listeria monocytogenes* allows isoleucine to serve as a  
715 host signal and virulence effector. *PLoS Genet* **14**:e1007283.
- 716 22. **Joseph B, Goebel W.** 2007. Life of *Listeria monocytogenes* in the host cells' cytosol.  
717 *Microbes Infect* **9**:1188-1195.
- 718 23. **Brown SA, Palmer KL, Whiteley M.** 2008. Revisiting the host as a growth medium.  
719 *Nat Rev Microbiol* **6**:657-666.
- 720 24. **Feyaerts J, Rogiers G, Corthouts J, Michiels CW.** 2015. Thiol-reactive natural  
721 antimicrobials and high pressure treatment synergistically enhance bacterial inactivation.  
722 *Innovative Food Science & Emerging Technologies* **27**:26-34.
- 723 25. **Bennett HJ, Pearce DM, Glenn S, Taylor CM, Kuhn M, Sonenshein AL, Andrew**  
724 **PW, Roberts IS.** 2007. Characterization of *relA* and *codY* mutants of *Listeria*  
725 *monocytogenes*: identification of the *CodY* regulon and its role in virulence. *Mol*  
726 *Microbiol* **63**:1453-1467.
- 727 26. **Lobel L, Sigal N, Borovok I, Ruppin E, Herskovits AA.** 2012. Integrative genomic  
728 analysis identifies isoleucine and *CodY* as regulators of *Listeria monocytogenes*  
729 virulence. *PLoS Genet* **8**:e1002887.
- 730 27. **Lobel L, Sigal N, Borovok I, Belitsky BR, Sonenshein AL, Herskovits AA.** 2015. The  
731 metabolic regulator *CodY* links *Listeria monocytogenes* metabolism to virulence by  
732 directly activating the virulence regulatory gene *prfA*. *Mol Microbiol* **95**:624-644.
- 733 28. **Lobel L, Herskovits AA.** 2016. Systems Level Analyses Reveal Multiple Regulatory  
734 Activities of *CodY* Controlling Metabolism, Motility and Virulence in *Listeria*  
735 *monocytogenes*. *PLoS Genet* **12**:e1005870.
- 736 29. **Belitsky BR.** 2014. Role of *PdxR* in the activation of vitamin B6 biosynthesis in *Listeria*  
737 *monocytogenes*. *Mol Microbiol* **92**:1113-1128.
- 738 30. **Biswas R, Sonenshein AL, Belitsky BR.** 2020. Genome-wide Identification of *Listeria*  
739 *monocytogenes* *CodY*-Binding Sites. *Mol Microbiol* doi:10.1111/mmi.14449.
- 740 31. **Brinsmade SR.** 2017. *CodY*, a master integrator of metabolism and virulence in Gram-  
741 positive bacteria. *Curr Genet* **63**:417-425.
- 742 32. **Sonenshein AL.** 2005. *CodY*, a global regulator of stationary phase and virulence in  
743 Gram-positive bacteria. *Curr Opin Microbiol* **8**:203-207.
- 744 33. **Levdikov VM, Blagova E, Colledge VL, Lebedev AA, Williamson DC, Sonenshein**  
745 **AL, Wilkinson AJ.** 2009. Structural rearrangement accompanying ligand binding in the  
746 GAF domain of *CodY* from *Bacillus subtilis*. *J Mol Biol* **390**:1007-1018.

- 747 34. **Levdikov VM, Blagova E, Young VL, Belitsky BR, Lebedev A, Sonenshein AL,**  
748 **Wilkinson AJ.** 2017. Structure of the Branched-chain Amino Acid and GTP-sensing  
749 Global Regulator, CodY, from *Bacillus subtilis*. *J Biol Chem* **292**:2714-2728.
- 750 35. **Sen S, Sirobhushanam S, Hantak MP, Lawrence P, Brenna JT, Gatto C, Wilkinson**  
751 **BJ.** 2015. Short branched-chain C6 carboxylic acids result in increased growth, novel  
752 'unnatural' fatty acids and increased membrane fluidity in a *Listeria monocytogenes*  
753 branched-chain fatty acid-deficient mutant. *Biochim Biophys Acta* **1851**:1406-1415.
- 754 36. **Auerbuch V, Lenz LL, Portnoy DA.** 2001. Development of a competitive index assay  
755 to evaluate the virulence of *Listeria monocytogenes* actA mutants during primary and  
756 secondary infection of mice. *Infect Immun* **69**:5953-5957.
- 757 37. **White SJ, McClung DM, Wilson JG, Roberts BN, Donaldson JR.** 2015. Influence of  
758 pH on bile sensitivity amongst various strains of *Listeria monocytogenes* under aerobic  
759 and anaerobic conditions. *J Med Microbiol* **64**:1287-1296.
- 760 38. **Begley M, Gahan CG, Hill C.** 2005. The interaction between bacteria and bile. *FEMS*  
761 *Microbiol Rev* **29**:625-651.
- 762 39. **Santiago B, MacGilvray M, Faustoferri RC, Quivey RG, Jr.** 2012. The branched-  
763 chain amino acid aminotransferase encoded by *ilvE* is involved in acid tolerance in  
764 *Streptococcus mutans*. *J Bacteriol* **194**:2010-2019.
- 765 40. **Moat AG.** 2002. *Microbial Physiology*, 4th ed. Wiley-Liss.
- 766 41. **Smith K, Youngman P.** 1992. Use of a new integrational vector to investigate  
767 compartment-specific expression of the *Bacillus subtilis* *spoIIM* gene. *Biochimie* **74**:705-  
768 711.
- 769 42. **Lauer P, Chow MY, Loessner MJ, Portnoy DA, Calendar R.** 2002. Construction,  
770 characterization, and use of two *Listeria monocytogenes* site-specific phage integration  
771 vectors. *J Bacteriol* **184**:4177-4186.
- 772 43. **LeDeaux JR, Grossman AD.** 1995. Isolation and characterization of *kinC*, a gene that  
773 encodes a sensor kinase homologous to the sporulation sensor kinases KinA and KinB in  
774 *Bacillus subtilis*. *J Bacteriol* **177**:166-175.
- 775 44. **Arnaud M, Chastanet A, Debarbouille M.** 2004. New vector for efficient allelic  
776 replacement in naturally nontransformable, low-GC-content, gram-positive bacteria. *Appl*  
777 *Environ Microbiol* **70**:6887-6891.
- 778 45. **Livak KJ, Schmittgen TD.** 2001. Analysis of relative gene expression data using real-  
779 time quantitative PCR and the  $2^{-(\Delta\Delta C(T))}$  Method. *Methods* **25**:402-408.
- 780

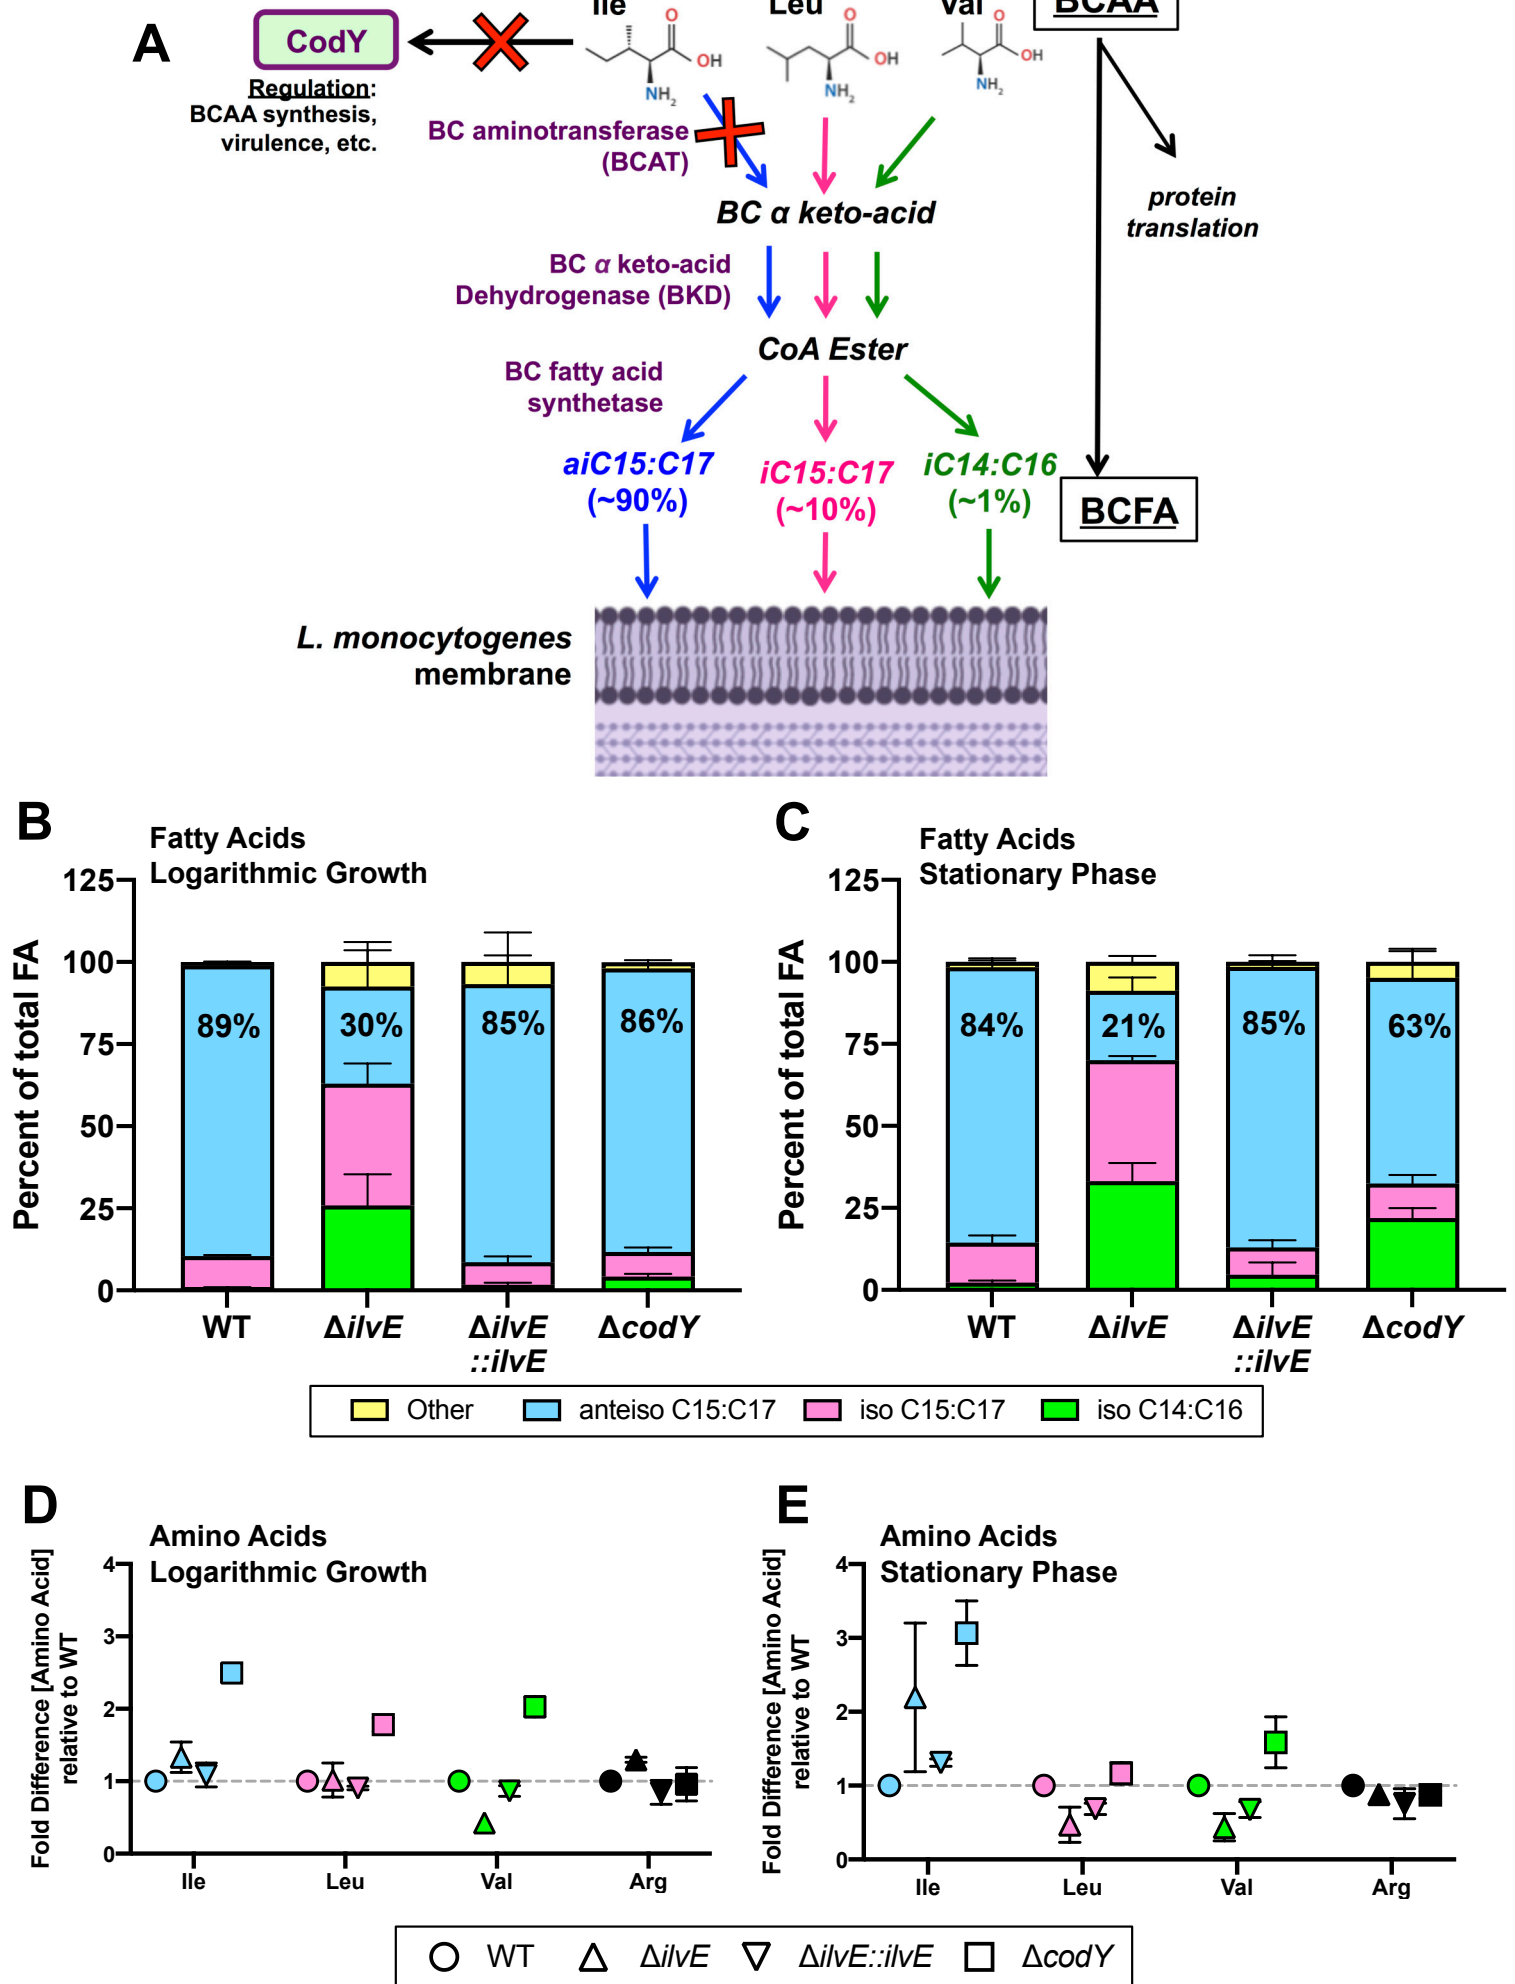

## Figure 1 Legend

**Figure 1. Changes in Fatty Acid and BCAA content in *Lm* lacking *IlvE* or *CodY*.** (A) Simplified overview of branched chain fatty acid (BCFA) biosynthesis in Gram-positive bacteria (based on detailed diagram in (9)) showing pathways that incorporate branched chain amino acids (BCAAs: Ile, Leu & Val). Red X represents points in pathways where deletion mutants were used in this study. Colored arrows indicate pathways of individual BCAAs that are incorporated into final BCFA isoforms (18). Purple text = enzyme names. (B and C) Graphs represent the relative amounts of the major fatty acids as a percentage of total fatty acids contained in *Lm* cultures of WT,  $\Delta ilvE$ ,  $\Delta ilvE::ilvE^+$  and  $\Delta codY$  strains grown in nutrient limiting medium (LDM) to (B) mid-logarithmic and (C) stationary phase. Graphs represent combined data from three independent experiments. Graphs shown here and data in Tables 2 and 3 are the combined quantities of odd numbered (C15 and C17) or even-numbered (C14 and C16) BCFAs. Individual numbered species (e.g., ai-C15 only) and all other fatty acids are in Supplemental Tables S3 and S4. (D and E). Cultures of WT,  $\Delta ilvE$ ,  $\Delta ilvE::ilvE$  and  $\Delta codY$  strains grown in LDM to (D) mid-logarithmic and (E) stationary phase were analyzed by mass spectrometry. Concentrations of BCAAs were normalized to total protein content and are shown as ratios relative to WT. Error bars show the range of fold difference compiled from 2 independent experiments.

## Figure 2

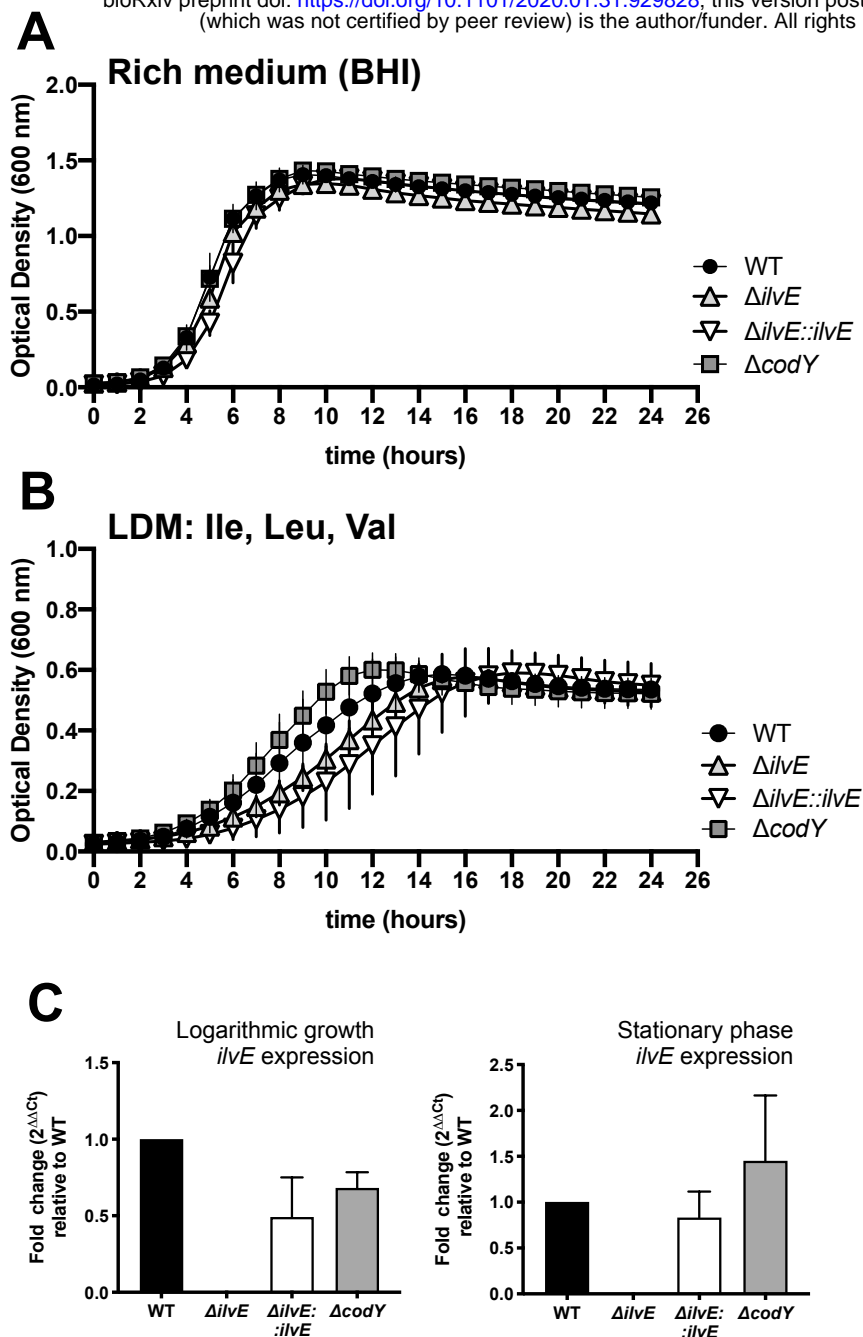

**Figure 2. Growth of  $\Delta ilvE$  and  $\Delta codY$  mutants in rich and nutrient-limited medium.** Bacterial growth of WT (circles),  $\Delta ilvE$  (triangles),  $\Delta ilvE::ilvE^+$  (inverted triangles), and  $\Delta codY$  (squares), was analyzed on a Bioscreen instrument. Samples were inoculated from recovered frozen cultures that had been prepared in LDM to mid-logarithmic phase. Optical Density at 600 nm (OD600) was measured for 24 hours at 37°C with shaking. Experiments include growth in (A) Rich medium = Brain Heart Infusion (BHI) and (B) LDM containing amino acids at 100  $\mu\text{g}/\text{mL}$ . Data are compiled from three independent experiments with three technical replicates per experiment. Each point is the mean with error bars representing the Standard Deviation. (C) RT-qPCR analysis of *ilvE* expression in Lm grown in LDM to logarithmic (left) and stationary (right) phase.



## Figure 2

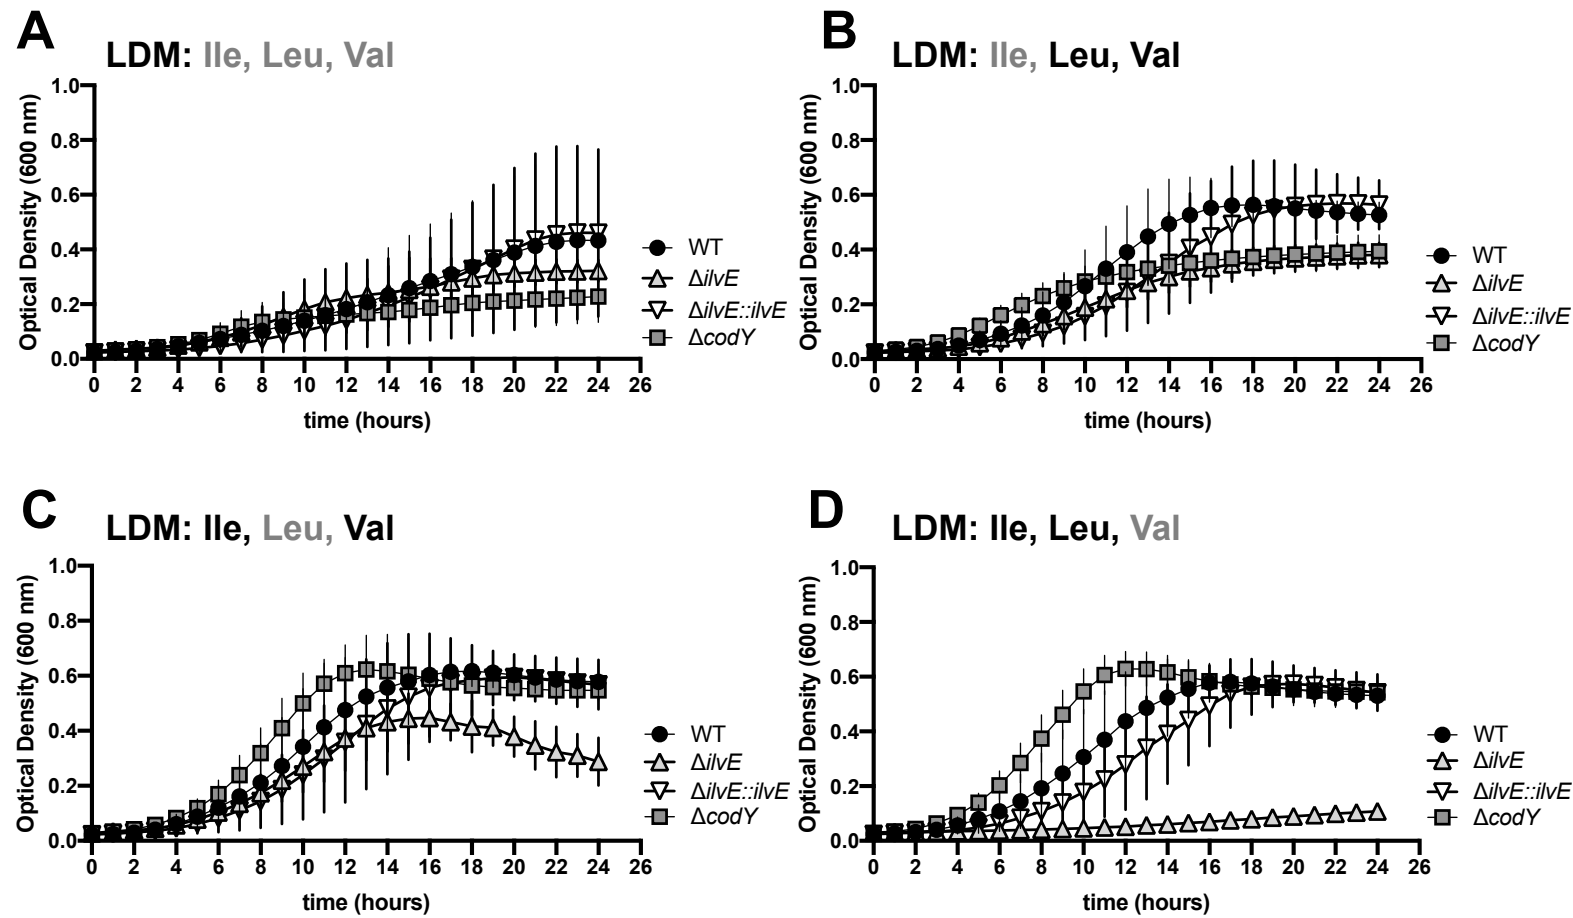

**Figure 3. Growth of *Lm* in LDM with variable exogenous BCAAs.** Bacterial growth of WT (circles),  $\Delta ilvE$  (triangles),  $\Delta ilvE::ilvE^+$  (inverted triangles), and  $\Delta codY$  (squares), performed as in Figure 2, but in LDM containing (A) no BCAAs, (B) no Ile (Val & Leu only), (C) no Leu (Ile & Val only), and (D) no Val (Ile & Leu only). Data are compiled from three independent experiments with three technical replicates per experiment. Each point is the mean with error bars representing standard deviation.

## Figure 4

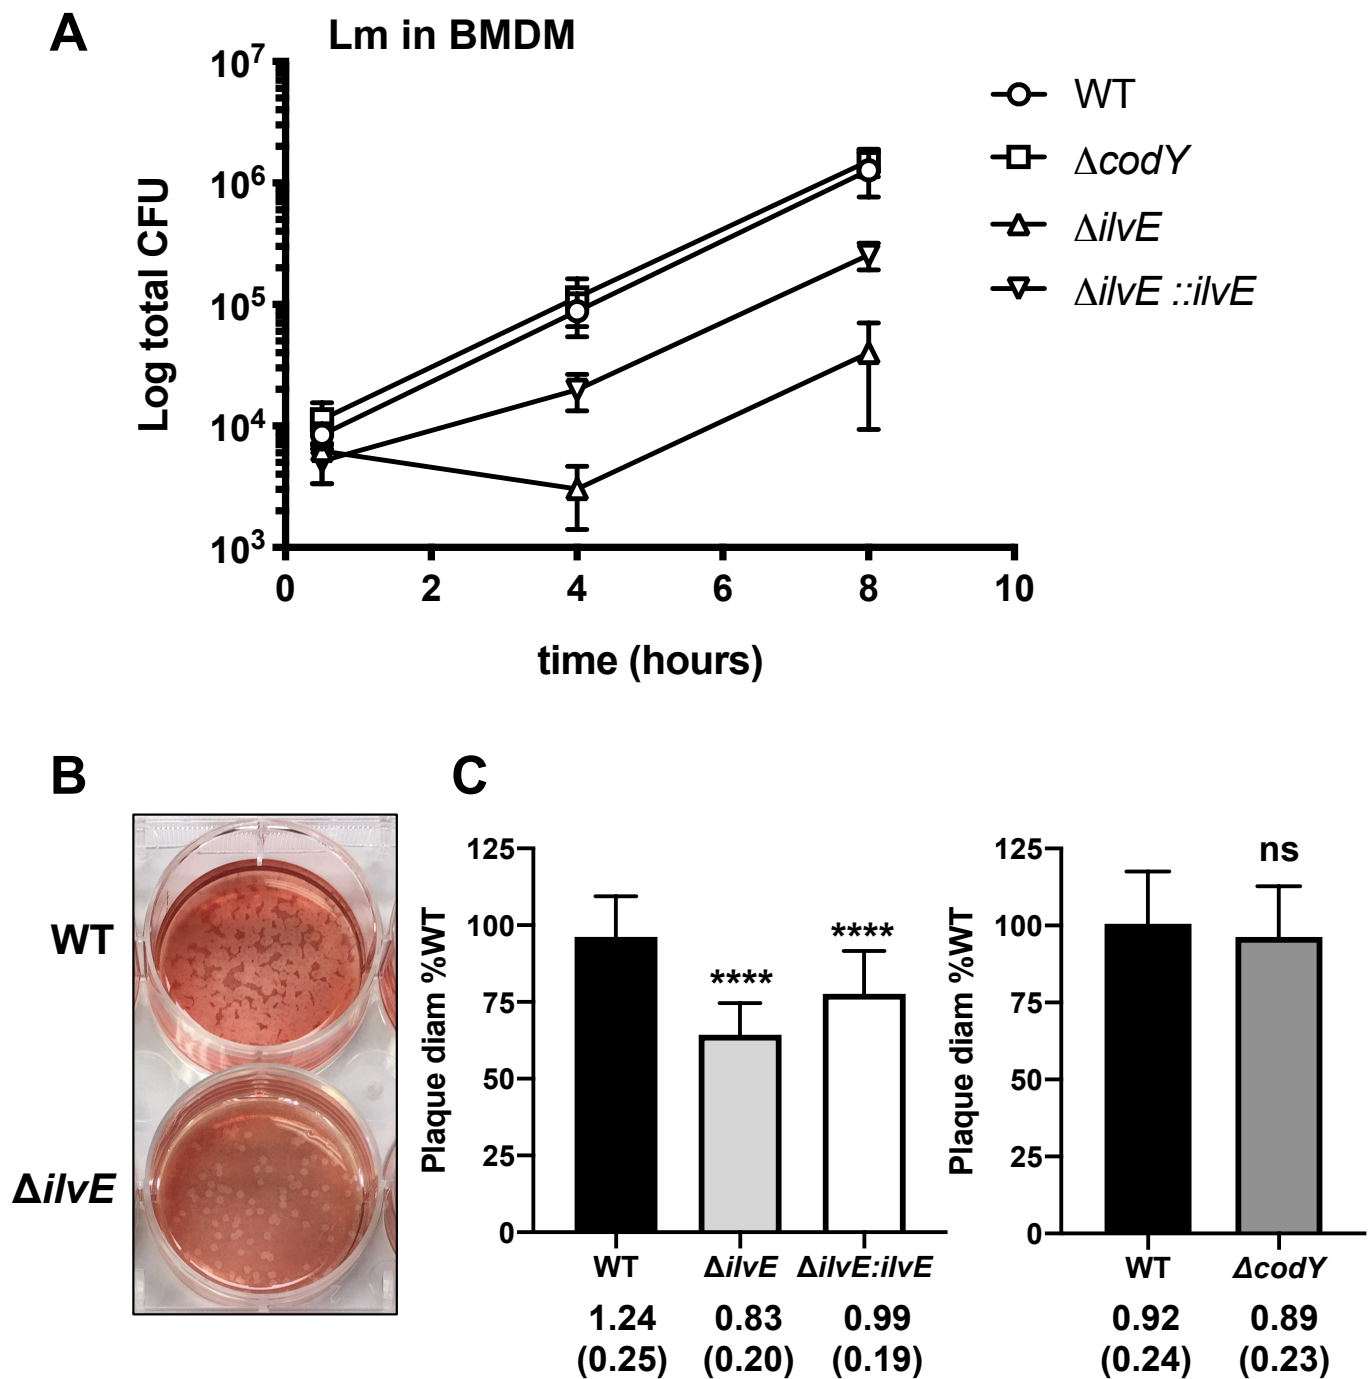

**Figure 4. IlvE is required for optimal growth in macrophages and for cell-to-cell spread in cell culture.** (A) Total CFU from survival assays of Lm infection of Bone Marrow Derived Macrophages (BMDM) assessed at 0.5, 4 and 8h post-infection. Data are compiled from three independent experiments showing mean and standard deviation. MOI = 1. (B-C) Plaque assay of Lm grown in L9 fibroblasts. (B) Representative image of plaques formed by WT &  $\Delta ilvE$  bacteria after 48h growth. (C) Average plaque diameters from experiments that included WT,  $\Delta ilvE$  and  $\Delta ilvE::ilvE^+$  (left) or WT and  $\Delta codY$  (right). Numbers below graphs are the mean plaque diameter with standard deviation compiled from three independent experiments. Two-tailed *t*-test comparing mutants to WT, \*\*\*\* $P < 0.0001$ ; ns = not significant.



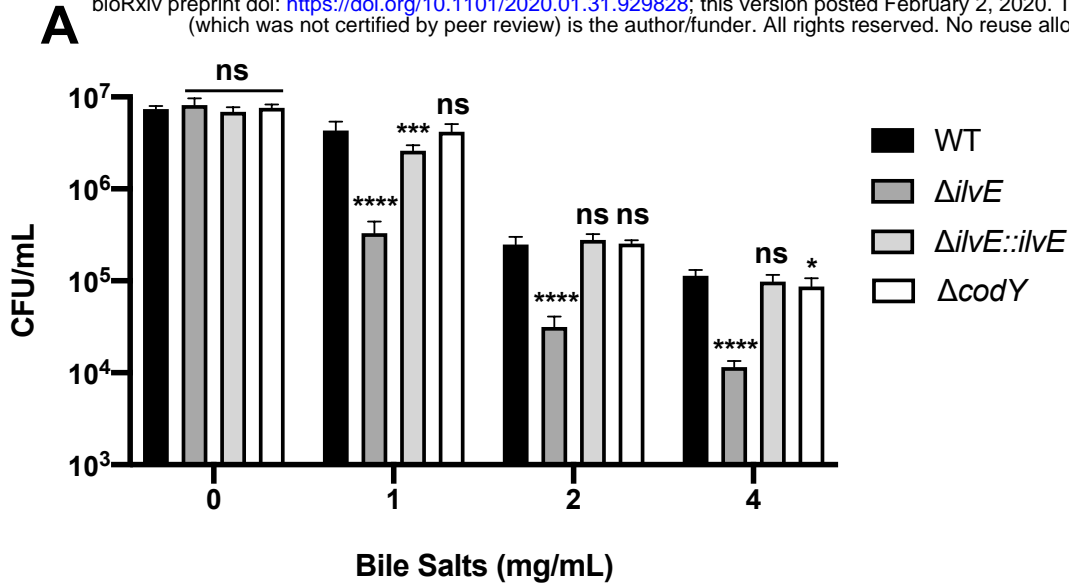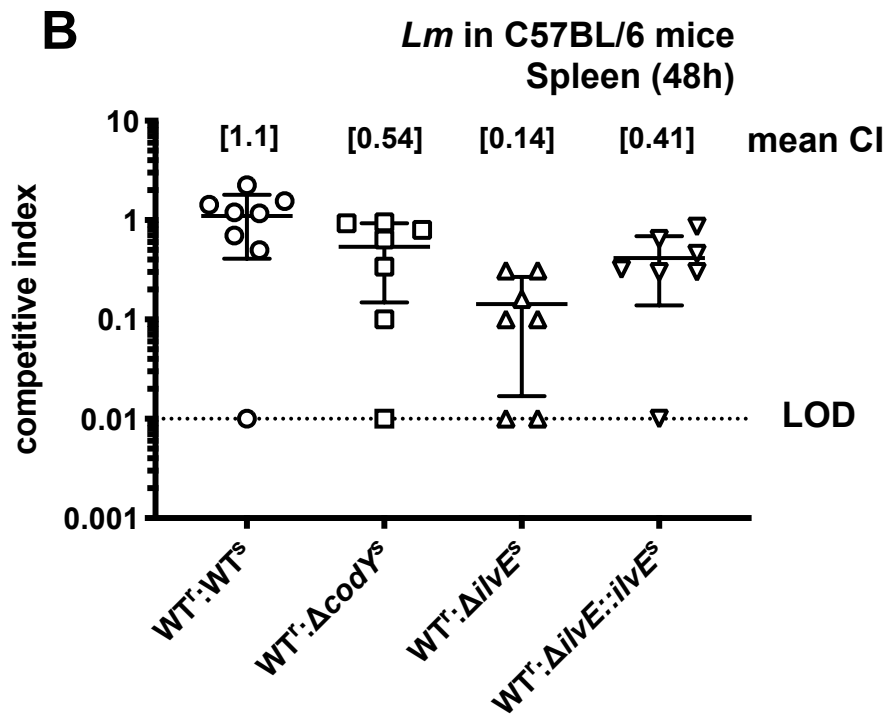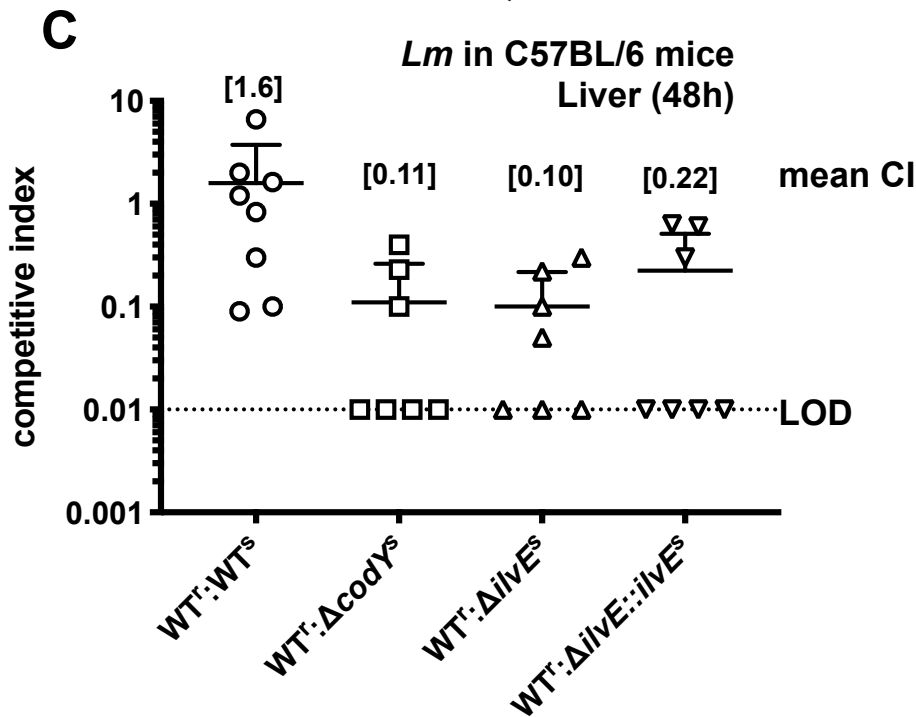

## Figure 5 Legend

**Figure 5. *IlvE* is required for resistance to membrane stress in response to bile salts and for survival in a mouse model of listeriosis.** (A) Log-phase bacteria grown in LDM were added to PBS with 0, 1, 2 and 4 mg/mL Bile Salts (Cholic acid-Deoxycholic acid sodium salt mixture) and incubated at 37°C for 30 minutes. Input for all samples was  $\sim 10^7$  CFU/mL. Data are compiled from three independent experiments. One-way ANOVA (non-parametric) with Dunn's multiple comparisons post-test comparing mutant strains to WT. ns = not significant; \* $P < 0.05$ ; \*\*\* $P < 0.001$ ; \*\*\*\* $P < 0.0001$ . (B and C) Female C56BL/6 mice were infected with a 1:1 mixture of erythromycin-sensitive test strains and erythromycin-resistant WT strain via intraperitoneal injection. After 48h infection, (B) spleens and (D) livers were harvested and assessed for viable CFU and competitive index (CI) was calculated as the ratio of Sensitive/Resistant CFU. Data represent two independent experiments with total  $n=7$  mice for all strains except WT, which was  $n=8$ . LOD = limit of detection.
